1  
2  
3  
4  
5  
6  
7  
8  
9  
10  
11  
12  
13  
14  
15  
16  
17  
18  
19  
20  
21  
22  
23  
24  
25  
26  
27  
28  
29  
30  
31

## Adaptive learning through temporal dynamics of state representation

Niloufar Razmi<sup>1,2</sup>, Matthew R. Nassar<sup>1,2</sup>

<sup>1</sup>Robert J. & Nancy D. Carney Institute for Brain Science, Brown University, Providence RI 02912-1821, USA

<sup>2</sup>Department of Neuroscience, Brown University, Providence RI 02912-1821, USA

Number of Pages: 37

number of Figures: 7

Number of Words: Abstract:239

Introduction: 1019

Discussion:2562

### Acknowledgments

We thank Linda Yu, Robert Wilson, Olga Lositsky, Romy Frömer and Cristian Buc Calderon for helpful discussion and comments. This work was supported by R00AG054732 to M.R.N.

### Competing interests

The authors declare that no competing interests exist.

Corresponding Author: Matthew Nassar ([matthew\\_nassar@brown.edu](mailto:matthew_nassar@brown.edu))

32

## 33 **Abstract**

34

35 People adjust their learning rate rationally according to local environmental statistics and calibrate such  
36 adjustments based on the broader statistical context. To date, no theory has captured the observed range of  
37 adaptive learning behaviors or the complexity of its neural correlates. Here, we attempt to do so using a  
38 neural network model that learns to map an internal context representation onto a behavioral response via  
39 supervised learning. The network shifts its internal context upon receiving supervised signals that are  
40 mismatched to its output, thereby changing the “state” to which feedback is associated. A key feature of  
41 the model is that such state transitions can either increase learning or decrease learning depending on the  
42 duration over which the new state is maintained. Sustained state transitions that occur after changepoints  
43 facilitate faster learning and mimic network reset phenomena observed in the brain during rapid learning.  
44 In contrast, state transitions after one-off outlier events are short-lived, thereby limiting the impact of  
45 outlying observations on future behavior. State transitions in our model provide the first mechanistic  
46 interpretation for bidirectional learning signals, such the p300, that relate to learning differentially  
47 according to the source of surprising events and may also shed light on discrepant observations regarding  
48 the relationship between transient pupil dilations and learning. Taken together, our results demonstrate that  
49 dynamic latent state representations can afford normative inference and provide a coherent framework for  
50 understanding neural signatures of adaptive learning across different statistical environments.

51

## 52 **Significance Statement:**

53 How humans adjust their sensitivity to new information in a changing world has remained largely an open  
54 question. Bridging insights from normative accounts of adaptive learning and theories of latent state  
55 representation, here we propose a feed-forward neural network model that adjusts its learning rate online  
56 by controlling the speed of transitioning its internal state representations. Our model proposes a mechanistic  
57 framework for explaining learning under different statistical contexts, explains previously observed  
58 behavior and brain signals, and makes testable predictions for future experimental studies.

59

## 60 **Introduction**

61 People and animals are often required to update behavior in the face of new information. While standard  
62 supervised learning or reinforcement learning models have shown great success in performing particular  
63 tasks and explaining general trends in behavior, they lack the flexibility of biological systems, which seem  
64 to adjust the influence of new information dynamically, especially in environments that evolve over time  
65 (Behrens, Woolrich, Walton, & Rushworth, 2007; Donahue & Lee, 2015; Farashahi, Donahue, Hayden,  
66 Lee, & Soltani, 2019; Li, Nassar, Kable, & Gold, 2019; Massi, Donahue, & Lee, 2018; Nassar & Gold,  
67 2010). Recent advances in understanding these adaptive learning behaviors have relied on probabilistic  
68 modeling to better understand the computational problems that organisms face for survival in their everyday  
69 life (Soltani & Izquierdo, 2019).

70 Bayesian probability theory has been extensively applied to describing adaptive learning algorithms in  
71 changing environment to provide normative accounts for learning behavior. Probabilistic models prescribe  
72 learning that is more rapid during periods of environmental change and slower during periods of stability

1.03 (Adams & MacKay, 2007; Behrens et al., 2007; Nassar & Gold, 2010; Wilson, Nassar, & Gold, 2010).  
1.04 These models have provided insight into why people seem to adjust learning according to their level of  
1.05 uncertainty (Browning, Behrens, Jocham, O'Reilly, & Bishop, 2015; Muller, Mars, Behrens, & O'Reilly,  
1.06 2019) and the probability with which an observation reflects a changepoint (Adams & MacKay, 2007;  
1.07 Nassar, Wilson, Heasly, & Gold, 2010). In this framework, the human brain is viewed as implementing an  
1.08 optimal learning algorithm that embodies the statistical properties of the world it operates in (Meyniel &  
1.09 Dehaene, 2017; O'Reilly, 2013).

1.10 While probabilistic modeling provides an ideal observer account for many of the adjustments in learning  
1.11 rate observed in humans and animals (Behrens et al., 2007; Nassar, Bruckner, & Frank, 2019; Nassar &  
1.12 Gold, 2010), it has thus far failed to clarify the underlying neural mechanisms. One issue is that exact  
1.13 Bayesian inference can be closely approximated by many qualitatively different algorithms (Bernacchia,  
1.14 Seo, Lee, & Wang, 2011; Farashahi et al., 2017; Iigaya, 2016; Mathys, Daunizeau, Friston, & Stephan,  
1.15 2011; Nassar et al., 2010; Wilson, Nassar, & Gold, 2013; A. J. Yu & Dayan, 2005). One such approximation  
1.16 that relies on a single dynamic learning rate can capture behavior across a wide range of statistical  
1.17 environments (Nassar, Waltz, Albrecht, Gold, & Frank, 2021). However, direct implementation of this  
1.18 model requires a dynamic learning rate signal that is invariant to statistical context – that is to say, if  
1.19 adaptive learning is accomplished through adjustments of a learning rate, then some brain signal must  
1.20 reflect the “learning rate” – and do so across all statistical contexts. Such a learning rate signal has yet to  
1.21 be observed in the brain, despite several attempts to do so across different statistical contexts (D'Acremont  
1.22 & Bossaerts, 2016; Li et al., 2019; Nassar, Bruckner, et al., 2019). In contrast, brain signals that predict  
1.23 more learning in discontinuously changing environments (Behrens et al., 2007; Jepma et al., 2016;  
1.24 McGuire, Nassar, Gold, & Kable, 2014; Nassar et al., 2012; O'Reilly et al., 2013), do not do so consistently  
1.25 across different statistical conditions (D'Acremont & Bossaerts, 2016). For example, feedback locked P300  
1.26 signals, which positively correlate with learning in discontinuously changing environments (Jepma et al.,  
1.27 2018, 2016), negatively correlate with learning in environments that contain occasional outlier (oddball)  
1.28 events (Nassar, Bruckner, et al., 2019). These observations run contrary to models that implement learning  
1.29 rate adjustments: if the brain adjusts a latent variable that controls “learning rate”, this signal should  
1.30 correlate with learning in any context with measurable adjustments of learning – for example, when the  
1.31 signal is stronger, consistently indicate more learning. Other approximations to normative learning have  
1.32 been more closely connected to specific neural signals, but fail to capture the range of behaviors displayed  
1.33 by people, for example the ability to immediately discount past experience after a changepoint (Bernacchia  
1.34 et al., 2011; Farashahi et al., 2017; Mathys et al., 2011), or the ability to calibrate learning across different  
1.35 statistical environments (Behrens et al., 2007). In sum, while previous models have explored the potential  
1.36 neural mechanisms for adaptive learning, no algorithm has captured the range of human behavior and its  
1.37 neural correlates across generative structures.

1.38 Here we build such a generalized framework based on the idea that adaptive learning is accomplished by  
1.39 controlling internal representations according to environmental structure (L. Q. Yu, Wilson, & Nassar,  
1.40 2021). We implement this idea with a feed-forward neural network model that maps an internal context  
1.41 representation (which can be thought of as its “mental context” and serves to organize learning across events  
1.42 much like the state in a reinforcement learning model) onto a continuous action space in order to perform  
1.43 a predictive inference task. We show that the effective learning rate of the model is proportional to the rate  
1.44 at which its internal context evolves in time, and that better model performance can be achieved when  
1.45 context transitions are discontinuous and elicited by surprising events. Furthermore, we show that context  
1.46 transitions can speed learning after changepoints, or slow them after oddball events, assuming appropriate  
1.47 state transitions occur between trials (L. Yu, Wilson, & Nassar, 2020). Our model produces these behaviors  
1.48 without an explicit representation of learning rate, and instead relies on an *internal context* that transitions

119 rapidly after surprising events much like patterns of activity previously observed in prefrontal cortex  
120 (Karlsson, Tervo, & Karpova, 2012; Nassar, McGuire, et al., 2019).

121 Furthermore, it requires *context transition signals* that bidirectionally affect learning according to statistical  
122 context (changepoint versus oddball), providing a mechanistic explanation for feedback-locked P300  
123 signals that show the same complex relationship to learning (Nassar, Bruckner, et al., 2019), and potentially  
124 shedding light on discrepant relationships between pupil diameter and learning that have been reported  
125 (compare Nassar et al., 2012 to O'Reilly et al., 2013). Taken together, our results support the idea that  
126 adaptive learning behavior emerges through abrupt transitions in mental context. Under this view, we argue  
127 that learning rate dynamics emerge as a consequence of changes in the internal representations to which  
128 learning is bound, and that the brain has no need to represent a global learning rate signal directly.

## 129 **Methods**

### 130 *Experimental task:*

131 We examine human and model behavior in a predictive inference task that has been described previously  
132 (McGuire et al., 2014; Nassar & Troiani, 2020). The predictive inference task is a computerized task in  
133 which an animated helicopter drops bags in an open field. In the pre-training session, human subjects  
134 learned to move a bucket with a joystick beneath the helicopter to catch bags that could contain valuable  
135 contents. During the main phase of the experiment, the helicopter was occluded by clouds and the  
136 participants were forced to infer its position based on the locations of bags it had previously dropped.

137 Our initial simulations focus on dynamic environments in which surprising events often signal a change in  
138 the underlying generative structure (changepoint condition; figures 1-5). In the changepoint condition, bag  
139 locations were drawn from a distribution centered on the helicopter with a fixed standard deviation of 25  
140 (unless otherwise specified in the analysis). The helicopter remained stationary on most trials, but  
141 occasionally and abruptly changed its position to a random uniform horizontal screen location. The  
142 probability of moving to a new location on a given trial is controlled by the hazard rate ( $H = 0.1$ ). Unless  
143 otherwise noted, our modeling results are presented with 32 simulated subjects, to correspond to the sample  
144 size in (McGuire et al., 2014).

145 We also considered a complementary generative environment in which surprising events were unrelated to  
146 the underlying generative structure (oddball condition; figure 6)(Nassar & Troiani, 2020). In the oddball  
147 condition, the helicopter would gradually move in the sky according to a Gaussian random walk (drift rate  
148 ( $DR$ ) = 10). In the oddball condition bags were typically drawn from a normal distribution centered on the  
149 helicopter as described above, but on occasion a bag would be dropped in random location unrelated to the  
150 position of the helicopter. The location of an oddball bag was sampled from a uniform distribution that  
151 spanned the entire screen. The probability of an oddball event was controlled by a hazard rate ( $H = 0.1$ ).

### 152 *Normative learning model:*

153 A simple delta rule can perform the predictive inference by incrementally updating beliefs about the  
154 helicopter location according to prediction errors:

$$155 \quad B_{t+1} = B_t + \alpha\delta \quad (1)$$

$$156 \quad \delta = \text{Bag Position}(t) - B_t(t) \quad (2)$$

157 here  $B$  is belief about the helicopter position on each trial,  $\delta$  is the prediction error observed on that trial,  
158 and  $\alpha$  is the learning rate. With a constant  $\alpha$ , the model assigns the same weight to all predictions and

109 outcomes. Previous work has shown that Bayesian optimal inference can be reduced to a delta rule learning  
110 under certain approximations, leading to normative prescriptions for learning rate that are adjusted  
111 dynamically (Nassar, Bruckner, et al., 2019; Nassar et al., 2010). The resulting normative learning model  
112 takes information which human subjects would normally obtain during the pre-training sessions including  
113 Hazard rate and standard deviation, but also computes two latent variables, by using the trial-by-trial  
114 prediction error: 1) changepoint probability which is computed after an outcome is observed and indicates  
115 the probability that the observed outcome has reflects a change in the helicopter location, and 2) relative  
116 uncertainty which is computed before making the next prediction and indicates the models uncertainty  
117 about the location of the helicopter. Detailed information regarding how CPP and RU are calculated can be  
118 found inprevious work. (Nassar, Bruckner, et al., 2019)

119 In the changepoint condition the normative learning rate  $\alpha_t$  is defined by:

$$120 \alpha_t = CPP + RU - CPP \times RU \quad (3)$$

121 Where CPP is changepoint probability and RU is relative uncertainty. Using these two latent variables,  
122 which both track the prediction error, but with different temporal dynamics (McGuire et al., 2014), the  
123 model computes a dynamic learning rate that increases after a changepoint and gradually decreases in the  
124 following stable period after a changepoint.

125 The same approximation to Bayesian inference can be applied in the oddball condition to produce a  
126 normative learning model that relies on oddball probability and relative uncertainty to guide learning. While  
127 the latent variables and form of the model mimic that in the changepoint condition, the learning rate differs  
128 in that it is reduced, rather than enhanced, in response to outcomes that are inconsistent with prior  
129 expectations:

$$130 \alpha_t = RU - OBP \times RU \quad (4)$$

131 Where OBP is the models posterior probability estimate that an outcome was an oddball event and RU  
132 reflects the model's uncertainty about the current helicopter location. Thus, normative inference in the  
133 oddball condition requires decreasing learning according to the probability of an extreme event (oddball),  
134 whereas normative inference in the changepoint condition required increasing it.

135

### 136 *Neural network models:*

137 In order to better understand how normative learning principles might be applied in a neural network we  
138 created a series of neural network models that use supervised learning rules to generate predictions in the  
139 predictive inference task. Specifically, we created a two-layer feed forward neural network that can perform  
140 the predictive inference task.

141 Network architecture includes two layers:

142 The input layer is composed of N neurons with responses characterized by a von Mises (circular)  
143 distribution with mean  $m$  and fixed concentration equal to 32 We implemented several versions of this  
144 model depending on how the mean  $m$  changes on a trial-by-trial basis.

145 The output layer contains neurons corresponding to spatial location of the bucket on the screen. The  
146 response of output layer neurons was computed by the weighted sum of input layer:

197 
$$r_j = \sum_{i=1}^{N_{in}} x_i w_{ij} \quad (5)$$

198 Where  $x_i$  is the activation of neuron  $i$  in the input layer,  $r_j$  is the response of neuron  $j$  in the output layer  
199 and  $w_{ij}$  is the connection weight between neuron  $i$  and neuron  $j$ . The bucket position chosen by the model  
200 on each trial was computed as a linear readout of the output layer:

201 
$$estimate = \sum_{j=1}^{N_{out}} L_j r_j \quad (6)$$

202 Where  $L_j$  is the location encoded by each corresponding unit  $r_j$  in the output layer. Weight matrix is  
203 randomly initialized with a uniform distribution of mean zero and SD equal to  $5 \times 10^{-4}$ . The network is  
204 then trained on each trial by modifying the weight matrix according to:

205 
$$w_{ij} = (1 - \eta)w_{ij} + \eta y_j x_i \quad (7)$$

206 Where  $y_j$  is the probability on a normal distribution centered on the observed outcome evaluated at  $L_j$  with  
207 standard deviation of 25 (equal to the standard deviation of the outcome generative process), and  $\eta$  is a  
208 constant synaptic learning rate controlling the weight changes of the neural network and was set to 0.1 for  
209 all models simulations. Although this value was chosen somewhat arbitrarily, more simulations using  
210 network learning rates in the range of [0.01 – 0.6] didn't affect the predictions of the model.

211

212 *Fixed context shift models:*

213 In the first models we consider, *fixed context shift* models, The mean  $m$  is computed on each trial as follows:

214 
$$m_{(t+1)} = m_{(t)} + \Delta m_f \quad (8)$$

215 Here,  $\Delta m_f$  takes a fixed value for all trials throughout the simulation (figure 2b&c). We considered 50  
216 different  $\Delta m_f$  values ranging from 0 to 2 in order to study the effect of context shifts on model performance.  
217 The word “context” refers to the subpopulation of input layer neurons that are firing above the threshold  
218 (here 0.0001 although the results are robust if using a range of values between 0.001-0.00001) on each trial.  
219 By incrementally increasing the mean of response distribution of the input layer, we can think of this context  
220 being changed on each trial. The architecture of the input layer is arranged in a circle so that hypothetically  
221 the context would be able to shift clockwise indefinitely. In order to minimize interference from previous  
222 visits to a set of context neurons we implemented weight decay ( $WD$ ) on each time step according to the  
223 following rule:

224 
$$W_{t+1}(x_t < threshold) = W_t(x_t < threshold) \times WD \quad (9)$$

225 
$$WD = 0.1$$

226 Note that this weight decay is not intended as a biological assumption, but rather a convenient simplification  
227 to allow the model to represent a large number of contexts with a small pool of neurons.

228 Therefore, on each trial, first the model would make a prediction based on weighted sum of the active input,  
229 observe an outcome, shift the context by the assigned context shift and store the supervised signal in the  
230 new context. This new context is in turn used at the beginning of the next trial to produce a response.

231

232 *Table 1- Summary of the parameters used for simulation of the probabilistic inference task and neural network training.*

| <b>Neural Network Parameter:</b>                      | <b>Value</b> | <b>Description</b>                                                                       |
|-------------------------------------------------------|--------------|------------------------------------------------------------------------------------------|
| Number of neurons in the input layer ( $N_{in}$ )     | 63           | Equally-spaced points between $[-\pi, +\pi]$ incrementing by 0.1                         |
| Concentration ( $\kappa$ )                            | 32           | Concentration of the von Mises pdf used in the input layer                               |
| Number of neurons in the output layer ( $N_{out}$ )   | 41           | Equally-spaced points between -50 and 350 , incrementing by 10                           |
| Synaptic learning Rate ( $\eta$ )                     | 0.1          |                                                                                          |
| Weight Decay Threshold                                | 0.01         |                                                                                          |
| Weight Decay Rate ( $WD$ )                            | 0.1          |                                                                                          |
| Model Hazard Rate                                     | 0.7          | The model uses a higher value compared to the actual hazard rate for optimal performance |
| Input Layer Threshold                                 | 0.0001       | Neurons firing above this threshold constitute the active “context” on each trial.       |
| <b>Task Parameter:</b>                                |              |                                                                                          |
| Hazard Rate ( $H$ )                                   | 0.1          | Probability of a changepoint/oddball trial                                               |
| Noise ( $\sigma_N$ )                                  | 25           | Standard Deviation of random process generating outcomes                                 |
| Standard Deviation of Drift Rate ( $\sigma_{drift}$ ) | 10           | Standard Deviation of the random process generating drift rate in oddball condition      |

233

234

235 *Ground Truth context shift model:*

236 To leverage the benefits of different context shifts which we observed in the fixed context shifts models we  
 237 designed a model that would use a context shift optimized for each trial. The ground truth context shifts  
 238 model has the same design of a fixed context shift model except instead of the constant term  $\Delta m$ , the model  
 239 computes  $\Delta m$  in a manner that depends on whether the current trial is a changepoint:

240

$$241 \Delta m = \begin{cases} \max(\Delta m_f). & \text{if } t \text{ is changepoint} \\ 0. & \text{otherwise} \end{cases} \quad (10)$$

242

243

244

240 *Dynamic context shift models:*

241 The ground truth context shift model assumes full knowledge of changepoint locations, whereas humans  
242 and animals must infer changepoints based on the data. Here we build plausibility into the ground truth  
243 model by controlling context shifts according to subjective estimates of changepoint probability (CPP) that  
244 are based on the observed trial outcomes:

245 
$$\Delta m = f(CPP) \quad (11)$$

246 The function,  $f$ , provides a fixed level of context shift according to the estimated changepoint probability  
247 by inverting the relationship between context shift and effective learning rate observed in the fixed context  
248 shift models and plotted in figure 2d. Thus, on each trial, the model will choose a context shift belonging  
249 to a fixed context shift model that has the closest effective learning rate to CPP. Thus, more surprising  
250 outcomes that yield higher values of CPP will consistently result in larger context shifts, with a changepoint  
251 probability of one resulting in the maximal context shift and a changepoint probability of zero resulting in  
252 no context shift at all.

253 CPP was computed either using the Bayesian normative model described above (Bayesian context shift) or  
254 from an approximation derived from the neural network itself (Network-based context shift). In the  
255 network-based version, the probability of a state transition is subjectively computed by the following  
256 equation:

257 
$$\frac{H/41}{H/41 + r_{X_t}(1-H)} \quad (12)$$

258 which can be interpreted as a network-based approximation to Bayesian CPP estimation (For more details  
259 see supplementary at [github.com/NassarLab/dynamicStatesLearning](https://github.com/NassarLab/dynamicStatesLearning) or in terms of a non-linear activation  
260 over prediction errors such as has been proposed in various conflict models (Botvinick, Braver, Barch,  
261 Carter, & Cohen, 2001; Cockburn & Frank, 2013).  $H$  can be thought of in Bayesian terms as a hazard rate,  
262 or in neural network terms as controlling the threshold of the activation function, and  $r_{X_t}$  is the firing rate  
263 of the output unit corresponding to the location  $X_t$ , which can be thought of as providing a readout of the  
264 outcome probability based on a Bayesian population code. The 41 reflects the total number of output units  
265 in our population, and since outcomes could occur that were in between the tuning of these units, in practice  
266 we used linear interpolation to estimate  $r_{X_t}$  based the two output units closest to the actual outcome location.  
267 The hazard rate  $H$  was set to 0.7 for the changepoint condition in order to achieve optimal performance (see  
268 supplementary figure 1 at [github.com/NassarLab/dynamicStatesLearning](https://github.com/NassarLab/dynamicStatesLearning)) Note that this fixed hazard rate,  
269 which maximized model performance, is considerably higher than the true rate of changepoints in the task  
270 (0.1).

271 *Mixture Model:*

272 In order to more closely match human participants' behavior in figure 4D we simulated predictions from a  
273 model that uses context shifts intermediate between our fixed- and dynamic-context shift models.  
274 Specifically, this model shifted context according to a weighted mixture of the context shift from the best  
275 performing fixed context shift model and the network-based context shift model as follows:

276 
$$\text{Context shift} = m * \text{fixed context shift} + (1-m) \text{dynamic context shift}$$

277 For simulations we selected  $m$  for each simulated participant at random from a uniform distribution ranging  
278 from zero to one.



284

285 *Extension of network models to the oddball condition:*

286 To test our proposed models in a variation of the task where prediction errors are not indicative of a change  
 287 in context i.e. oddball condition we use the same design of neural network but with a simple modification  
 288 in temporal dynamics of context shifts.

289 The task involved the same paradigm described above, but with outcomes (i.e. bag locations) determined  
 290 by a different generative structure. In particular, the helicopter location gradually changed its position in  
 291 the sky with a constant drift rate, and bags were occasionally sampled from a uniform distribution spanning  
 292 the range of possible outcomes, rather than being “dropped” from the helicopter itself (Nassar & Troiani,  
 293 2020; Nassar et al., 2021).

294 The ground truth neural network model was modified to incorporate the alternate generative structure of  
 295 the oddball condition. In particular, on each trial, input activity mean  $m$  was changed by 1) maximally  
 296 context shifting in response to oddballs at the time of feedback, 2) “returning” from the oddball induced  
 297 context shift at the end of the feedback period, prior to the subsequent trial, and 3) adding a constant value  
 298 (0.05) proportional to the fixed drift rate of the random walk process prior to making the prediction. (For  
 299 choosing this constant drift rate, we ran simulations with different values of drift rate and chose one that  
 300 produced optimal behavior) Thus after a prediction is made on trial context mean changes according to:

$$301 \quad \Delta m_1 = \begin{cases} \max(\Delta m_f), & \text{if } t \text{ is oddball} \\ 0 & \text{otherwise} \end{cases} \quad (13)$$

302

$$303 \quad m_{t+1} = m_t + \Delta m_1 \quad (14)$$

304 But, after the model receives the supervised signal (represented by a normal distribution which is centered  
 305 on the bag position with standard deviation corresponding to standard deviation of bag drops) and stores  
 306 it the new context, context transition back to:

$$307 \quad m_{t+1} = m_t - \Delta m_1 + \Delta m_2 \quad (15)$$

308 Where  $\Delta m_2$  is a constant (here 0.05) is proportional to the drift rate of the random walk process. This  
 309 leads the information from oddball trial to be stored in a different context that will not influence the  
 310 upcoming prediction of the model.

311 The dynamic context shift models were constructed to follow the same logic, but using subjective measures  
 312 of oddball probability rather than perfect knowledge about whether a trial is an oddball. Specifically, we  
 313 updated context upon observing feedback according to the probability that the feedback reflects an oddball  
 314 (OP):

$$315 \quad \Delta m_1 = f(OP) \quad (16)$$

$$316 \quad m_{t+1} = m_t + \Delta m_1 \quad (17)$$

317 And prior to making a prediction for the subsequent trial returned to the previous context except with a  
 318 slight shift modeling to account for the drift in the helicopter position due to the random walk:

$$319 \quad m_{t+1} = m_t - \Delta m_1 + \Delta m_2 \quad (18)$$

320 This model captures the intuition that if an outcome is known to be an outlier, it should be partitioned from  
321 knowledge that pertains to the helicopter location, rather than combined with it. To accomplish this, the  
322 model changes the context first according to the oddball probability or  $\Delta m_1$  in above equation, after storing  
323 the supervised learning signal in the new context, the model transition back to its previous context by  
324 subtracting the first context shift term  $\Delta m_1$  and move the context according to a constant shift proportional  
325 to the drift rate  $\Delta m_2$ . The  $\Delta m_1$  term causes significant shifts on oddball trials, but after that the model  
326 transition back to previous context and shifts according to the  $\Delta m_2$  which would not be influenced by  
327 oddball trials. Similar to the changepoint condition, here, we also made a version of the dynamic Bayesian  
328 context shift model, which used network output layer activity to compute subjective measures of oddball  
329 probability.

330

331 *Representational similarity analysis:*

332 We computed a trial-by-trial dissimilarity matrix where each cell in the matrix represent the number  
333 corresponding to the dissimilarity between the input layer activity on two trials. The dissimilarity matrix  
334 ( $D$ ) of the dynamic context shifts model uses Euclidean distance and is computed by:

335 
$$D_{ij} = \sqrt{\sum_{q=1}^{N_{in}} (Act_{(i,q)} - Act_{(j,q)})^2} \quad (19)$$

336 *Behavioral analysis:*

337 Behavioral analyses are aimed at understanding the degree to which we revise our behavior in response to  
338 new observations. In order to quantify this, we define an “effective learning rate” as the slope of the  
339 relationship between trial-to-trial predictions errors (i.e. the different between the bucket position and bag  
340 position) and trial-to-trial updates (i.e. the change in bucket position from one trial to the next). The  
341 adjective “effective” is chosen here so that this learning rate won’t be mistaken by the reader with two other  
342 learning rates used in this paper: 1) the fixed synaptic learning rate of the neural network 2) the normative  
343 learning rate prescribed by the reduced Bayesian model. To measure effective learning rate, we regressed  
344 updates (UP) onto the prediction errors (PE) that preceded them:

345 
$$UP = \beta_0 + \beta_1 \times PE \quad (20)$$

346 The resulting slope term,  $\beta_1$  captures the effective learning rate, or the amount of update expected for a  
347 given prediction error. We also performed a more extensive regression analysis that included terms for 1)  
348 prediction error 2) prediction error times changepoint probability 4) prediction error times relative  
349 uncertainty (figure 4d).

350 *Comparison to P300 analysis:*

351 For analyzing the effect of trial-to-trial variability in context shifts from the dynamic context shift model  
352 on effective learning rate produced by that model, we fit the regression model above to simulated  
353 predictions for the dynamic context shift models, but did so while splitting data into quartiles according to  
354 the size of the context shift size that the model underwent on a given trial. The corresponding figure (figure  
355 6e) of P300 signal and learning rate are from ref (Nassar, Bruckner, et al., 2019).

356 *Pupil Response Simulation:*

357 We modeled 480 trials of a predictive inference task for each of the two conditions (oddball, changepoint).  
358 We created synthetic pupil traces by defining time points for feedback-locked context shifts, which occurred  
359 400ms after oddball or changepoint, and pre-prediction context shifts at 900ms after oddball events (see eq.

360 10 & 13). We used measurements of context shift for the respective changepoint and oddball trials (see eq.  
361 11 & 16) at these time points and convolved these measurements with a gamma distribution to create  
362 simulated time courses of a pupil response under the assumption that the pupil signal reflects the need for  
363 a context shift. We analyzed this signal with a regression model that was applied to all synthetic data in  
364 sliding windows of time. Explanatory variables in our model included surprise (changepoint/oddball  
365 probability computed from normative model) and learning (trial-by-trial learning rate computed from the  
366 normative model).

367

## 368 **Results**

369 In order to test whether changes to latent state representations can facilitate adaptive learning behavior we  
370 modeled a predictive inference task designed to measure adaptive learning in humans (figure 1) (McGuire  
371 et al., 2014). In the task a helicopter, which is hidden behind clouds, drops visible bags containing valuable  
372 contents from the sky (figure 1a, right). On each trial, the subject moves a bucket to the location where they  
373 believe the helicopter to be, such that they can catch potentially valuable bag contents. Subjects can move  
374 the bucket to a new position on each trial to update and improve their prediction (figure 1a, left; figure 1b  
375 orange arrow). In the “changepoint” variant of the task, bag locations were sampled from a Gaussian  
376 distribution centered on the helicopter, which occasionally relocated to a new position on the screen. Such  
377 abrupt transitions in helicopter location led to changes in the statistical context defining the bag locations  
378 (context shifts), which could be inferred by monitoring the size of prediction errors (figure 1b, red arrow).  
379 Therefore, the helicopter position is a dynamic latent variable that must be inferred from noisy observations  
380 (i.e. dropped bags) on each trial to yield optimal task performance. Previous work has shown that human  
381 behavior can be captured by a normative learning model that relies on a dynamic “learning rate” adjusted  
382 from trial-to-trial according to changepoint probability (CPP) and uncertainty (figure 1b&c), but failures to  
383 identify neural signals that reflect this dynamic learning rate consistently across conditions cast doubt on  
384 its biological relevance (D’Acromont & Bossaerts, 2016; Nassar, Bruckner, et al., 2019; Nassar et al., 2012;  
385 O’Reilly et al., 2013). Here we explore whether normative learning may instead be achieved in the brain  
386 by a neural network that undergoes dynamic transitions in the mental context to which associates are bound,  
387 thereby adjusting where information is stored, rather than the degree to which storage occurs.

388

389

390

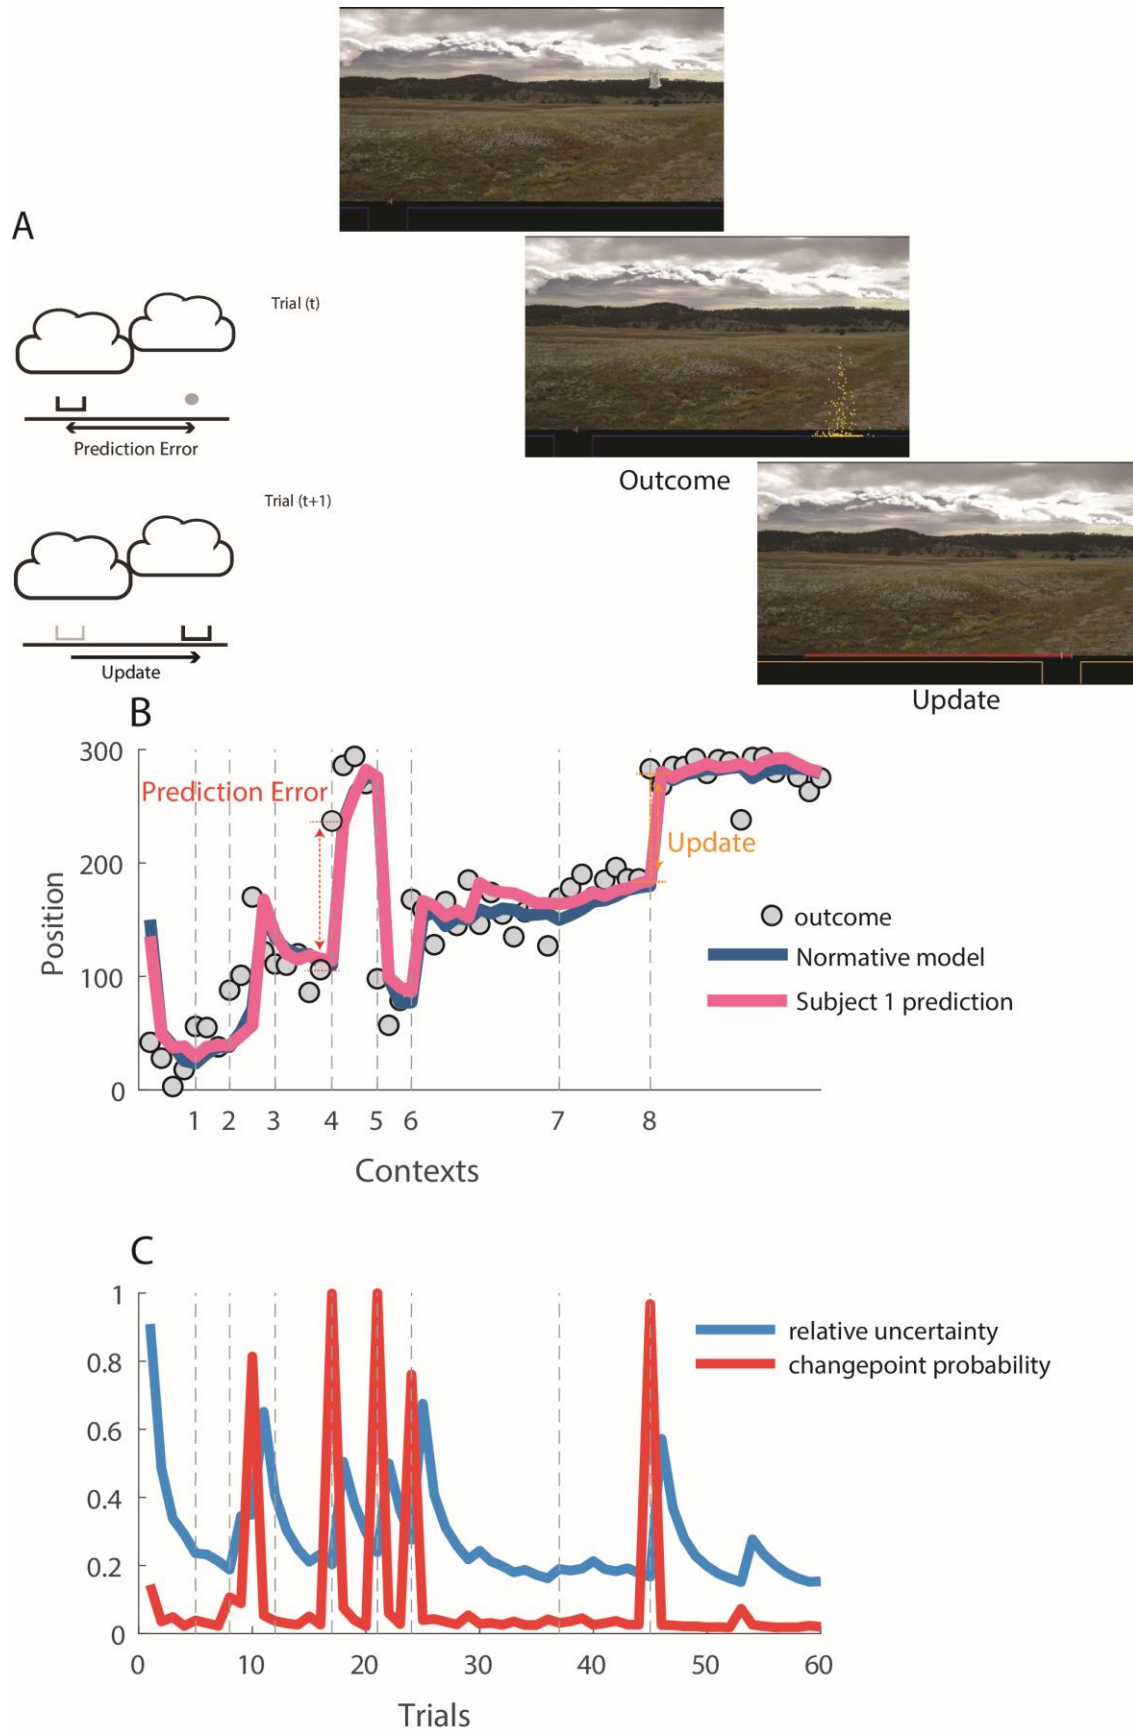

392 **Figure 1: Predictive inference task to measure dynamics of adaptive learning.**

393 A) Schematic Illustration (left) and screenshots of the predictive inference task (right). Human subjects place a bucket  
394 at horizontal location on the bottom of the screen to catch a bag of coins that will be subsequently dropped from a  
395 hidden helicopter. After observing the bag location (outcome) at the end of each trial, along with their prediction error  
396 (distance between bucket and outcome), the subject could improve their response by adjusting their bucket position  
397 (update). In the changepoint condition, the helicopter typically remains stationary but occasionally moves to a  
398 completely new location. B) The sequence of bag locations (outcome; ordinate) is plotted across trials, which are  
399 segmented into discrete contexts reflecting periods with a stationary mean. Context transitions (dotted vertical lines)  
400 reflect changepoints in the position of the helicopter. Bucket placements made by a subject (pink) and normative  
401 model (navy) are shown with a representation of an example prediction error and outcome. [Prediction error = outcome  
402 (t) – estimate (t) and Update = estimate (t+1) – estimate (t)]. (C) The learning rate, which defines the degree to which  
403 the normative model updates the bucket in response to a given prediction error, depends on two factors, changepoint  
404 probability (CPP; red) and relative uncertainty (RU; blue), which combine to prescribe learning that is highest at  
405 changepoints (CPP) and decays slowly thereafter (RU).

406

407 *A neural network test bed for exploring adaptive learning*

408 To examine how normative updating could be implemented in a neural network, we devised a two-layer  
409 feedforward neural network in which internal representations of context are mapped onto bucket locations  
410 by learning weights using a supervised learning rule (figure 2b; see methods). Units in the output layer of  
411 the network represent different possible bucket locations in the predictive inference task and a linear readout  
412 of this layer is used to guide bucket placement, which serves as a prediction for the next trial. After each  
413 trial, a supervised learning signal corresponding to the bag location is provided to the output layer and  
414 weights corresponding to connections between input and output units are updated accordingly.

415 The input layer of our model is designed to reflect the mental context to which learned associations are  
416 formed, and its activity is given by a Gaussian activity bump with a mean denoting the position of the  
417 neuron with the strongest activity and a standard deviation denoting the width of the activity profile. The  
418 primary goal of this work is to understand how changes to the mean of the activity bump, across trials,  
419 affect learning within our model. Since the input layer of the network reflects mental context, it does not  
420 receive any explicit sensory information, and we can manipulate its activity across trials to provide a  
421 flexible test bed for how different task representations (i.e. mental context dynamics) might affect  
422 performance of the model. In particular, we examine how displacing the mean of the activity bump in the  
423 input layer across trials affects the rate and dynamics of the networks learning behavior. In the simplest  
424 case, a non-dynamic network, the mean of the activity bump in the input layer is constant across all trials -  
425 - reflecting learning onto a fixed “state”. A slightly more complex mental context might be one that drifts  
426 slowly over time, such that the mean of the activity bump changes a fixed amount from one trial to the next  
427 leading trials occurring close in time to be represented more similarly. In this case, learning would occur  
428 onto an evolving temporal state representation. In a more complex (but maybe more intuitive) case, the  
429 subset of active neurons in the input layer could correspond to the current “helicopter context” (figure 1b),  
430 or period of helicopter stability. In this case, the mean of the activity bump would only transition on trials  
431 where the helicopter changes position and thus could be thought of as representing the underlying latent  
432 state of the helicopter (e.g. this is the third unique helicopter position I have encountered) – albeit without  
433 any explicit encoding of its position.

434

435

436 *Context shifts facilitate faster learning*

437

438 We first examined performance of models in which the mean of the input activity bump transitioned by  
439 some fixed amount on each trial. This set included 0 (fixed stimulus representation), small values in which  
440 nearby trials had more similar input activity profiles (timing representation) and extreme cases where there  
441 was no overlap between the input layer representations on successive trials (individuated trial  
442 representation). We defined the fixed shift in the mean of the activity profile as the “context shift” of our  
443 model. This shift is depicted in figure 2c as the nodes shown in “hot colors” (i.e. active neurons) in the  
444 input layer of the neural network moving to the right; Note how the size of rightward shift in the schematic  
445 neural network is constant in all four trials shown. We used increments starting from zero (the same input  
446 layer population) to a number corresponding to a complete shift (completely new population) in each trial.  
447 Learning leads to fine tuning of the weights by strengthening connections between active input neurons and  
448 the output neurons nearby the outcome location (bag position) on each trial. We observed that moderate  
449 shifts of in the input layer (context shifts) led to the best performance in our task (figure 2e), and that the  
450 effective learning rate describing the model’s behavior monotonically scaled with context shift (figure 2d).  
451 We also compared the performance of these models to a delta-rule equipped with learning rates matched to  
452 those empirically observed in each fixed context shift model (figure 2d). Performance of fixed-context shift  
453 networks mirrored that of delta-rule models, both in terms of overall performance and the advantage  
454 conferred to moderate context shifts in the network (figure 2e, black), or learning rates in the delta rule  
455 (figure 2e, red). Together, these results support the notion that context shifts could be used to enhance the  
456 sensitivity of behavior to new observations, analogous to adjusting the learning rate in a delta rule.

457

458

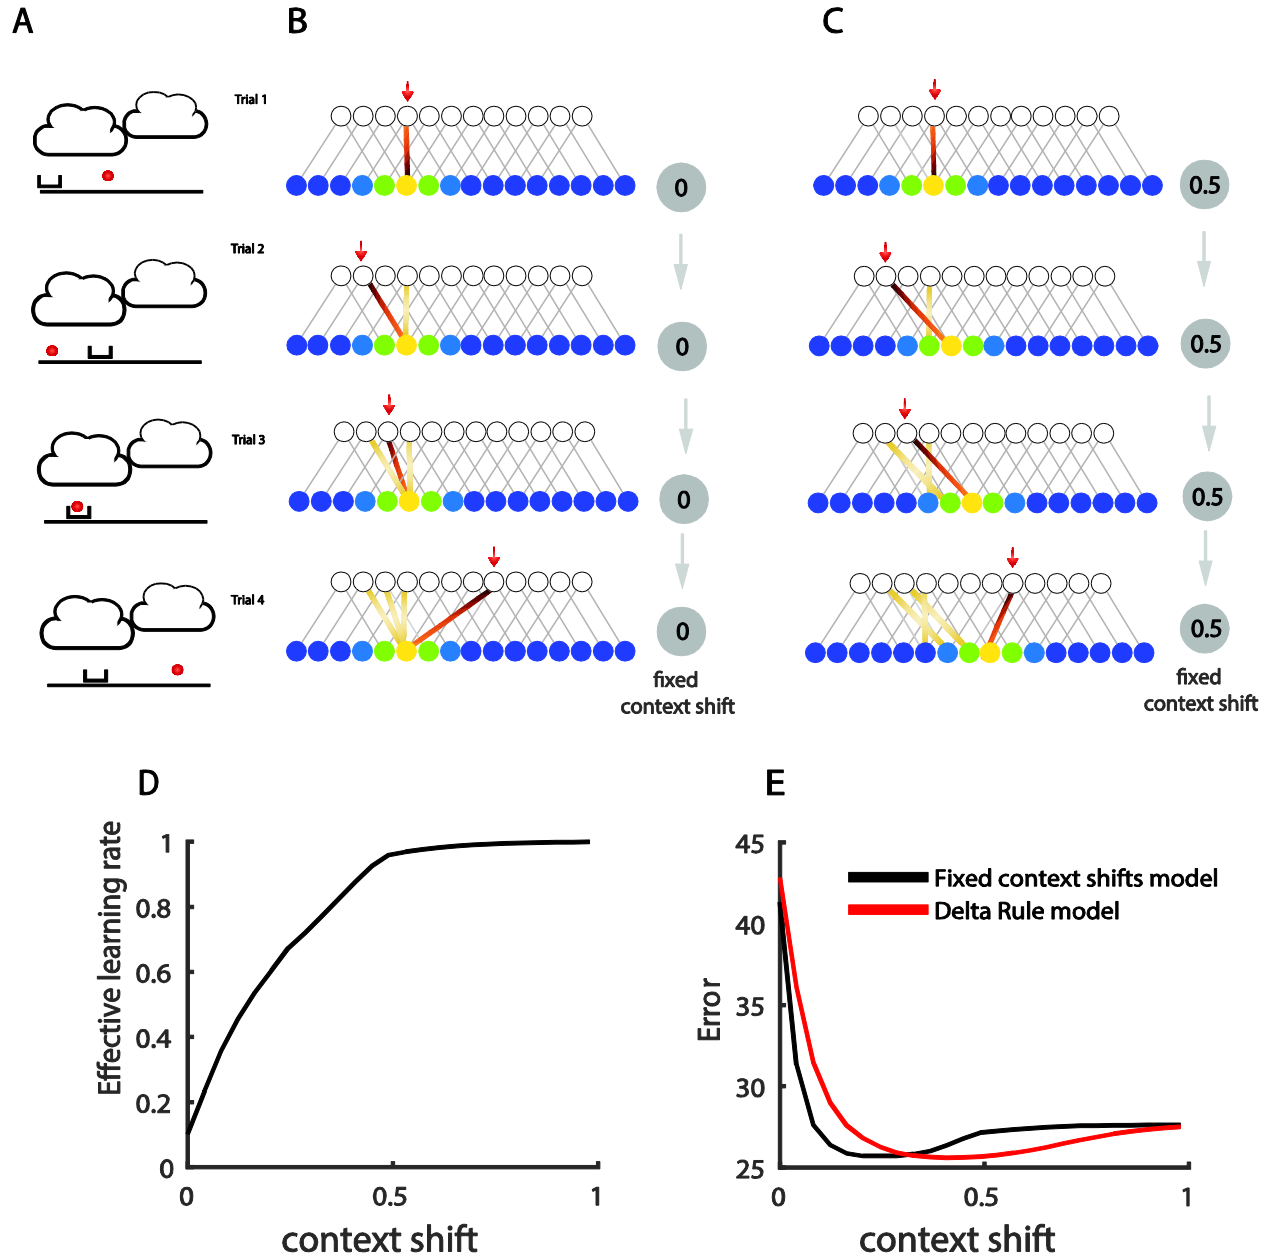

409

470 **Figure 2: A neural network with fixed context shifts can approximate any constant learning rate.** A-C) Network  
 471 structure and weight updates for two fixed context shift models (B, C) are depicted across four example trials of a  
 472 predictive inference task (A). For all networks, feedback was provided on each trial corresponding to the observed  
 473 bag position (circle in panel A, red arrow in B&C) and weights of network were updated using supervised learning.  
 474 Only a subset of neurons (circles) and connections between them (lines) are shown in neural network schematic.  
 475 Activation in the input layer was normally distributed around a mean value that was constant in (B) and shifted by a  
 476 fixed amount on each trial in (C) (context shift). Learned weights (colored lines) were all assigned to the same input  
 477 neuron when context shift was set to zero (B) but assigned to different neurons when the context shift was substantial  
 478 (C). D) The effective learning rate (ordinate), characterizing the influence of an unpredicted bag position on the  
 479 subsequent update in bucket position, increased when the model was endowed with faster internal context shifts  
 480 (abscissa). E) Mean absolute prediction error (ordinate) was minimized by neural network models (black line) that  
 481 incorporated a moderate level of context shift from one trial to the next (abscissa). Mean error of a simple delta rule  
 482 model using various learning rates is shown in red (x-axis values indicate the context shift equivalent to the fixed delta

rule learning rate derived from panel D). For each simulated delta rule model we plotted the x position according to the amount of context shift that yielded that learning rate from that fixed context shift model, thus the position on the x-axis reflects the same amount of average learning of the two models but the mechanics of how learning is generated differs across the two models. Note that neural networks with fixed context shifts achieve similar task performance to more standard delta-rule models that employ a constant learning rate.

#### *Dynamic context shifts can improve task performance*

The higher performance of moderate context shift models (figure 2e) might be thought of intuitively as navigating the classic trade-off between flexibility and stability. A higher learning rate, which can be effectively produced by a larger context shift, promotes flexibility and leads to better performance in response to environmental changes that render past observations irrelevant to future ones (figure 3c). In contrast, smaller learning rates, which are effectively produced by smaller context shifts, yield stable predictions that facilitate a performance advantage in a stable but noisy environments by averaging over the noise (figure 3d). More concretely, when the helicopter remains in the same location, small context shifts improve performance by pooling learning over a greater number of bag locations to better approximate their mean, but large context shifts can improve performance after changes in helicopter location by reducing the interference between outcomes before and after the helicopter relocation. Inspired by the observed relationship between context shift and accuracy, we next modified the model to dynamically adjust context shifts to optimize performance. In principle, based on the intuitions above, we might improve on our fixed context shift models by only shifting the activity profile of the input layer at a true context shift in the task (i.e. allow the input layer to represent the latent state). Since such a model requires pre-existing knowledge of changepoint timings we refer to it as the ground truth model (figure 3, top). Indeed, we observed that the ground truth model performs as well as the best fixed context shift model after changepoint (figure 3c), and better than the best fixed context shift model during periods of stability (figure 3d), yielding overall performance better than any fixed context shift model (figure 3e).

Needless to say, the brain does not have access to perfect information regarding whether a given trial is a changepoint or not. Is it possible to make a more realistic version of this optimal model, utilizing information that the brain does have access to? To answer this question, we built models that infer changepoint probability based on experienced prediction errors. We built two versions of this model, one that computed changepoint probability (CPP) explicitly according to Bayes rule (Nassar & Gold, 2010), and one that approximated CPP according to the mismatch between output activity in the network and the observed outcome (i.e. supervised signal). In both cases, hazard rates necessary for computing CPP were optimized for performance, resulting in model hazard rates exceeding their experimental values (See Supplementary figure 1 at [github.com/NassarLab/dynamicStatesLearning](https://github.com/NassarLab/dynamicStatesLearning)). Both models achieved good performance after changepoints by elevating context shifts (figure 3c) and during periods of stability by reducing context shifts (figure 3d), yielding overall performance better than any fixed context shift model, and only slightly worse than the ground truth model (figure 3e&f). These results were consistent across different noise conditions (See supplementary figure 2 at [github.com/NassarLab/dynamicStatesLearning](https://github.com/NassarLab/dynamicStatesLearning)).

010

011

012



Figure 3

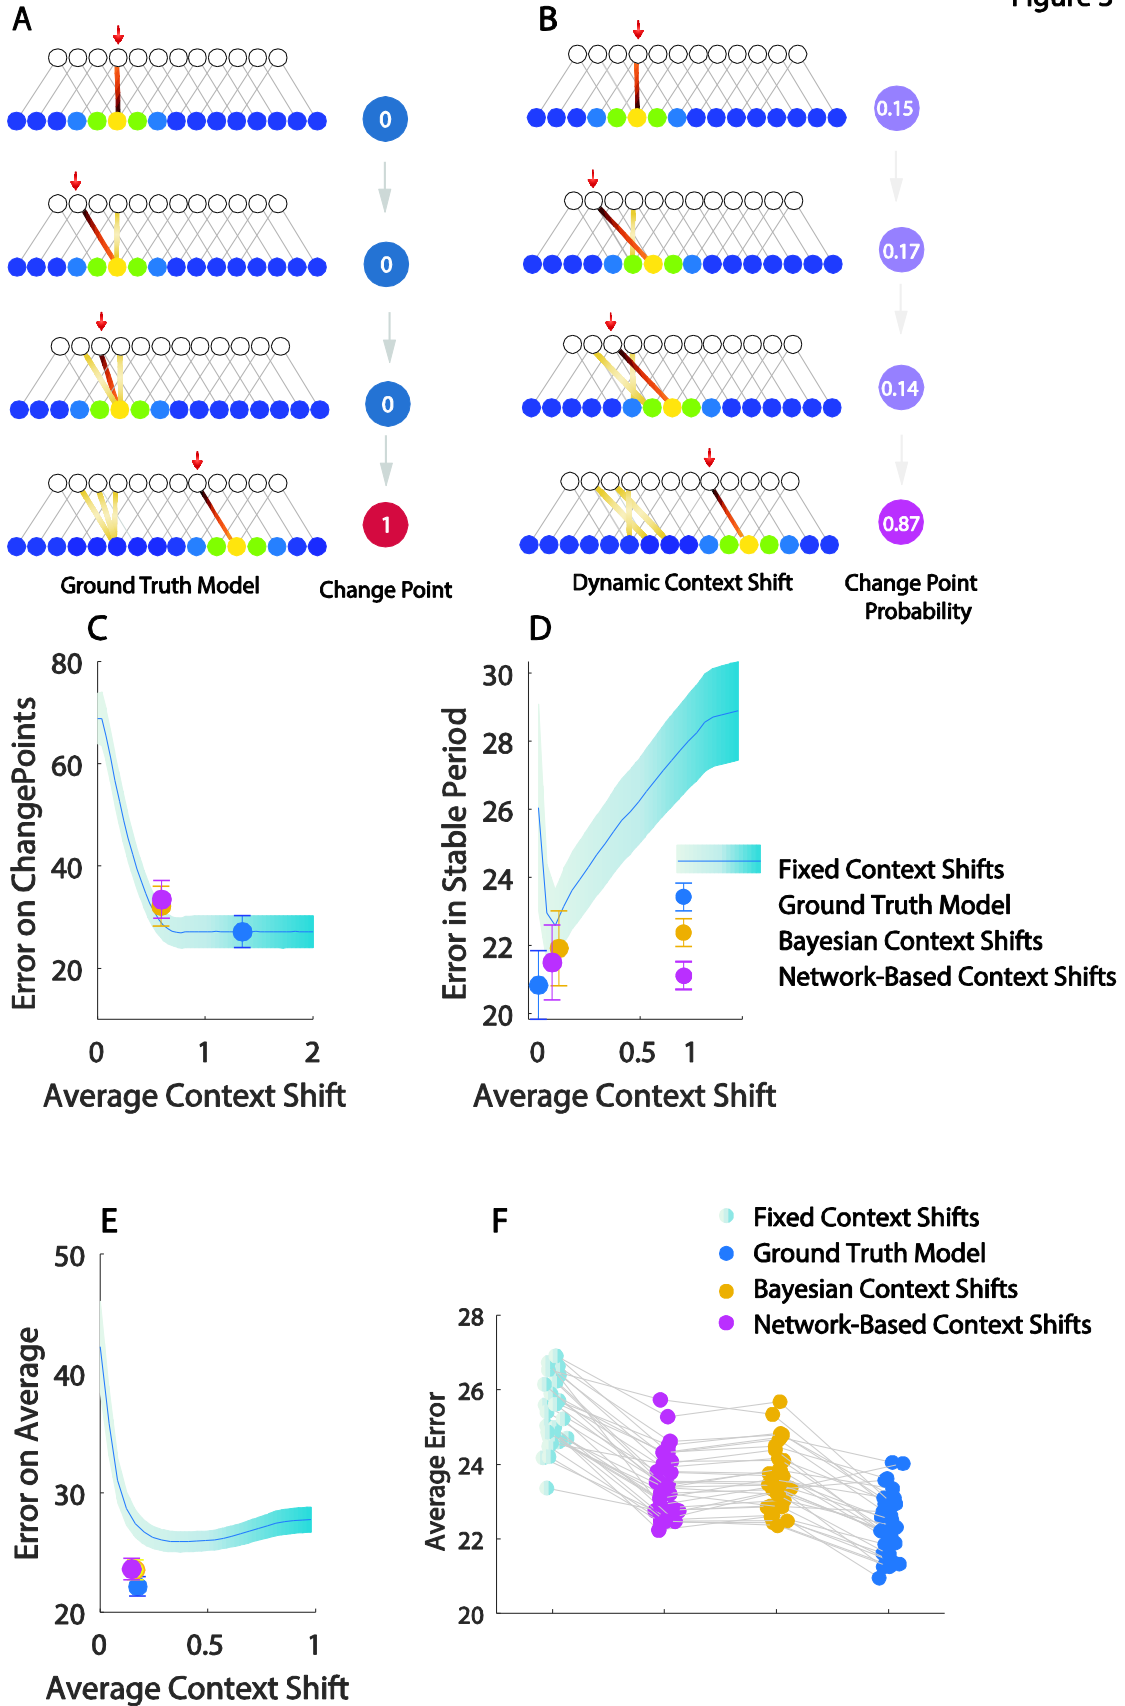

014

010 **Figure -3: Dynamic context shifts facilitate better task performance.** A) Schematic diagram of ground truth  
011 model network (left) which is provided with objective information about whether a given trial is changepoint or not  
012 (right) and uses that knowledge to shift the context only on changepoint trials. B) The dynamic context shift network  
013 uses a subjective estimate of changepoint probability based a statistical model (Bayesian) or the network output  
014 (Network-based) to adjust its context shift on each trial. All of these models shift context to a greater degree on  
015 changepoint trials (bottom row) than on non-changepoint trials (top 3 rows). C) Performance on trials immediately  
016 following a changepoint was best for models employing the largest context shifts. Mean error on trials following a  
017 changepoint (ordinate) is plotted as a function of context shift (abscissa) for fixed (line/shading) and dynamic (points)  
018 context shift models. The ground truth model (blue point) minimized error after changepoints through large context  
019 shifts, and the dynamic context shift models, which made moderately large context shifts after changepoints, also  
020 approached this level of performance (yellow & pink). Note that since the optimal policy on changepoint trials is to  
021 use a learning rate of one, any model with a large enough context shift would be able to achieve optimal performance  
022 on this subset of trials (note performance of highest fixed context shift models). D) Smallest errors on trials during  
023 periods of stability (> 5 trials after changepoint; ordinate) were achieved by models that made smaller context shifts  
024 (abscissa). All dynamic context shift models (ground truth, Bayesian, network-based) made relatively small context  
025 shifts for stable trials, yielding good performance. E) Across all trials, subjective dynamic context shift models yielded  
026 better average performance than the best fixed context shift model and approached the performance of the ground  
027 truth model. F) Average Error for individual simulations showing the Bayesian (yellow) and network-based (pink)  
028 context shift models beat the best fixed context shift model (blue) consistently across simulated task sessions  
029 (*Bayesian Context Shift* :  $t = 21.9$ .  $df = 31$ .  $p < 10^{-16}$  *Network – Based Context Shift*:  $t = 20.48$ .  $df =$   
030  $31$ .  $p < 10^{-16}$  ).

036

037 *Dynamic context shifts capture key behavioral and neural signatures of adaptive learning in humans.*

038 Not only was the dynamic context shift model able to outperform fixed context shift models, it did so by  
039 capturing behaviors that are observed in people. The model updated predictions according to prediction  
040 errors, but relied more heavily on prediction errors from certain trials (figure 4a). We can quantify the  
041 effective learning rate as the slope of the relationship between the model's bucket update and its previously  
042 observed prediction error in order to compare the behavior of different models (figure 4a). Looking at this  
043 *effective learning rate* in more detail, we observe that immediately after a changepoint, learning rate  
044 becomes maximal for the ground truth model and dynamic context shift models while gradually decreasing  
045 during the more stable periods (figure 4b). A regression analysis, previously used in explaining humans'  
046 responses in a similar task, determined the contribution of changepoint probability and relative uncertainty  
047 to updates in each model (figure 4c) and indicated that, like human subjects, the dynamic context shift  
048 model learned more rapidly during periods of change or uncertainty (figure 4d). The fixed context shift  
049 model (green) does not increase learning on changepoint trials, but instead, displays more subtle dynamics  
050 that depend on the exact magnitude of the context shift employed (see supplementary figure 3  
051 [github.com/NassarLab/dynamicStatesLearning](https://github.com/NassarLab/dynamicStatesLearning)). Note that most participants (gray dots in figure 4c) fall  
052 between the range of behaviors spanning from the fixed context shift model (green dot) and the network-  
053 based context shift model (pink dot) suggesting that people may use a mental context representation that  
054 lie somewhere between a purely temporal one (i.e. fixed context shift) and our subjective approximation of  
055 latent state (network-based context shift). To examine this possibility, we created a mixture model that  
056 updated context as a linear mixture of those prescribed by the network-based dynamic model and those  
057 prescribed by the best fixed context shift model. Uniformly sampling mixture weights in this model  
058 produced heterogenous behaviors that reproduced basic patterns of individual differences in our subject  
059 population (figure 4D). One such behavioral pattern is that individuals with high fixed-learning coefficients,  
060 also tend to have lower values of change point driven learning (note crossover from first to second

061 coefficient in figure 4C). The simulated mixture model not only reproduced the range of subject coefficients  
062 for each regressor, but also produces this crossover effect (compare gray dots in 4D to those in 4C). Taken  
063 together, these results suggest that our dynamic context shift models capture the primary behavioral features  
064 of adaptive learning in changing environments – but unlike previous such models they do so by adjusting  
065 an internal context, rather than a learning rate per se.

066 These context adjustments provide a potential explanation for rapid changes in activity patterns, or  
067 “network resets”, that have been observed during periods of rapid learning in rodent mPFC and human  
068 OFC (Karlsson et al., 2012; Nassar, McGuire, et al., 2019). Rodent studies previously identified neural  
069 population activity changes that occurred during periods of uncertainty when animals were rapidly shifting  
070 behavioral policies (Karlsson et al., 2012). Human neuroimaging work took a similar approach to identify  
071 patterns of activity that changed more rapidly during periods of rapid learning following changepoints, after  
072 controlling for other factors (Nassar, McGuire, et al., 2019). An important open question raised by these  
073 studies is why such representations exist at all; in both cases the representations were not reflecting the  
074 behavioral policy, and their dynamics would not be necessary for implementing existing models of adaptive  
075 learning (Nassar et al., 2012, 2010). Given that our dynamic context shift model accomplishes adaptive  
076 learning by dynamically changing the context representations, we asked whether our input layer might give  
077 rise to population dynamics similar the phenomena observed in these previous studies.

078 To do so, we used an RSA approach to create a dissimilarity matrix reflecting differences in the input layer  
079 activation across pairs of trials for our dynamic context shift model (figure 5a). By using the activity profile  
080 of the input layer the dynamic context shift model we were able to obtain a pattern of dissimilarity across  
081 all pairs of trials for each simulated task session (figure 5b). Examining this dissimilarity matrix reveals  
082 abrupt representational shifts at changepoints (dotted lines in figure 5B). To quantify the observed changes  
083 in activity pattern, we computed the dissimilarity across adjacent pairs of trials, and examined how this  
084 adjacent trial similarity was affected by changepoints in the task. Consistent with empirical data, we found  
085 that representations in our context layer shifted more rapidly immediately after a changepoint (figure 5C;  
086 mean dissimilarity for changepoint/non changepoint trials = 0.73/0.22,  $t = -54.54$ ,  $df = 31$ ,  $p < 10^{-16}$ ). In  
087 some sense, this is not surprising, given that we built our model to achieve faster learning after changepoints  
088 by shifting the activity pattern in the input layer. Nonetheless, our model provides a potential normative  
089 explanation for why “network reset” phenomena are observed during periods of rapid learning: in our  
090 model, such changes in activity optimize behavior by providing a clean slate for learning after  
091 environmental change.

092

093

094

095

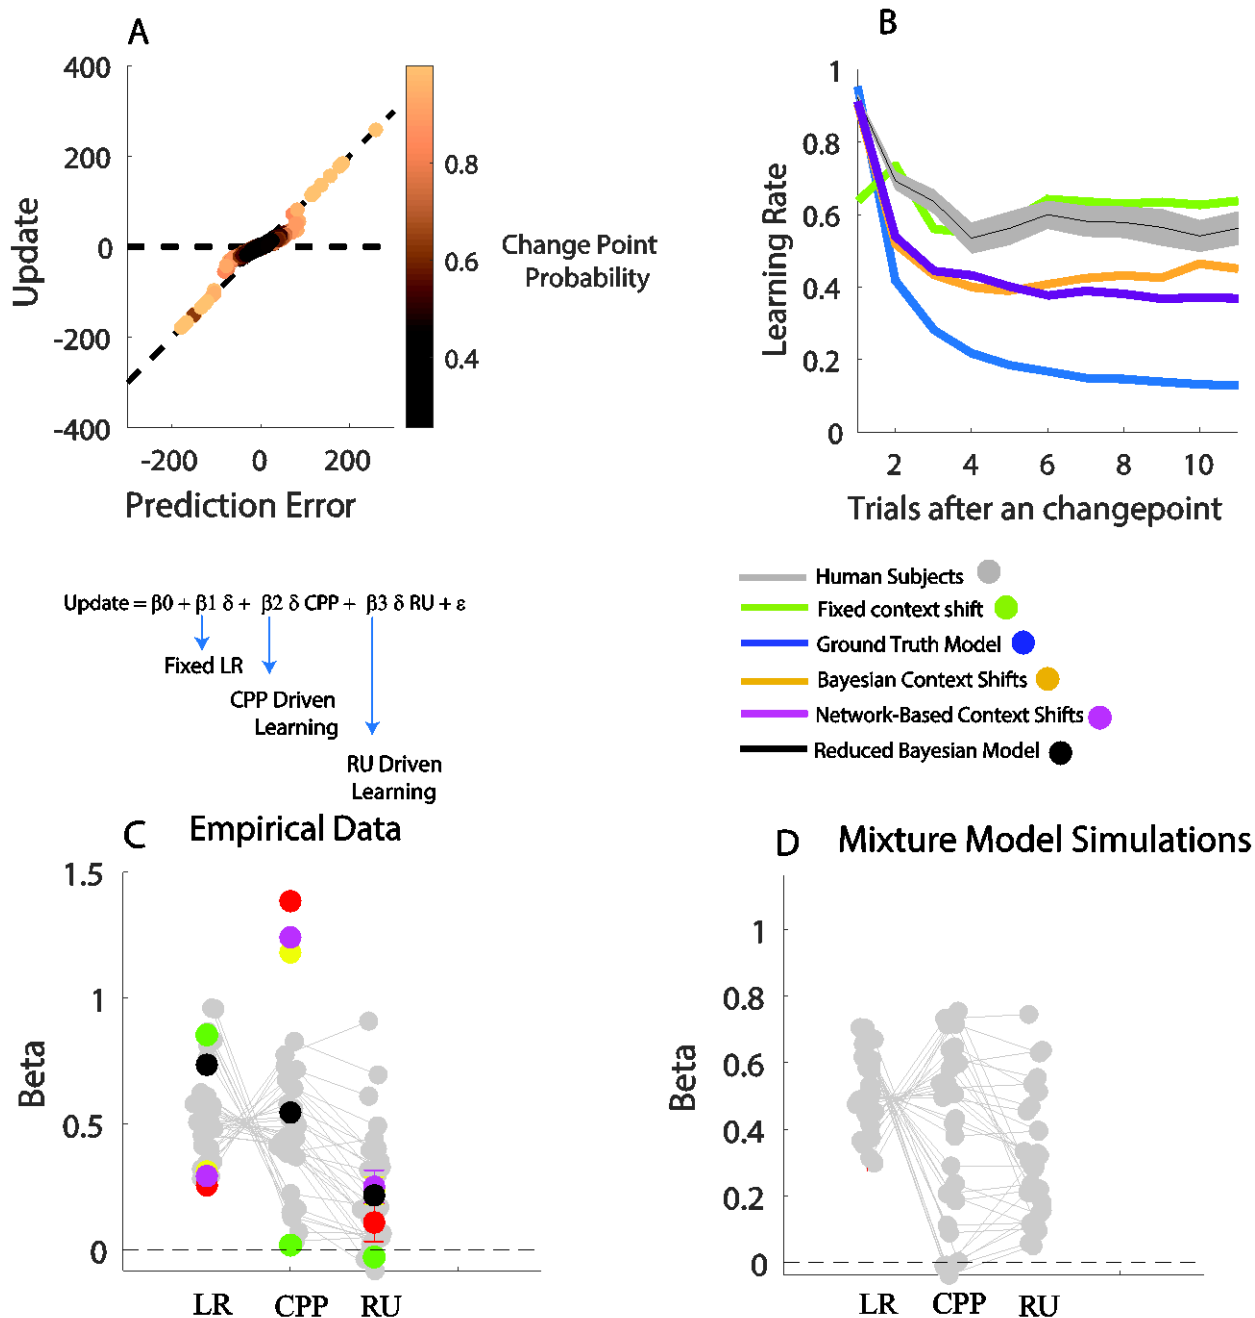

096

097  
 098  
 099  
 100  
 101  
 102  
 103  
 104  
 105  
 106

**Figure 4: Dynamic context shifts facilitate adaptive learning.** A) Dynamic context shift model single trial update (ordinate) is plotted against prediction error (abscissa) for each single trial of a simulated session with points colored according to the normative changepoint probability. Note that large absolute prediction errors, corresponding to high changepoint probabilities, tend to lead to updates on the unity line, corresponding to an effective learning rate of one. B) Effective learning rate (ordinate) is plotted for trials that differ in their alignment to the most recent changepoint (abscissa). Both ground truth and dynamic context shifts models show adjustments in their effective learning rate relative to changepoints, maximizing learning immediately after the changepoint, with the dynamic context shift models (yellow and pink) qualitatively matching the pattern of learning in human subjects (gray). Learning rate dynamics of the best fixed context shift model are shown in green for comparison. C) Coefficients from a regression model (top equation) fit to single trial updates to characterize the degree of overall learning (fixed LR),

617 adjustments in learning at likely changepoints (CPP Driven Learning), and adjustments in learning according to  
 618 normative uncertainty (RU driven learning). Colored circles reflect mean coefficients fit to each model and grey circles  
 619 represent fits to individual human subjects. D) Coefficients from the same regression, but fit to simulations from a  
 620 model that employs a weighted mixture of a fixed context shift (the same context shift as the model shown in green)  
 621 and the dynamic context shift (the network-based model shown in purple). Each gray point reflects a different  
 622 simulation with a mixture weight sampled at random from a uniform distribution on the interval from zero to one.  
 623 Note similarity to participant data in (C).  
 624  
 625

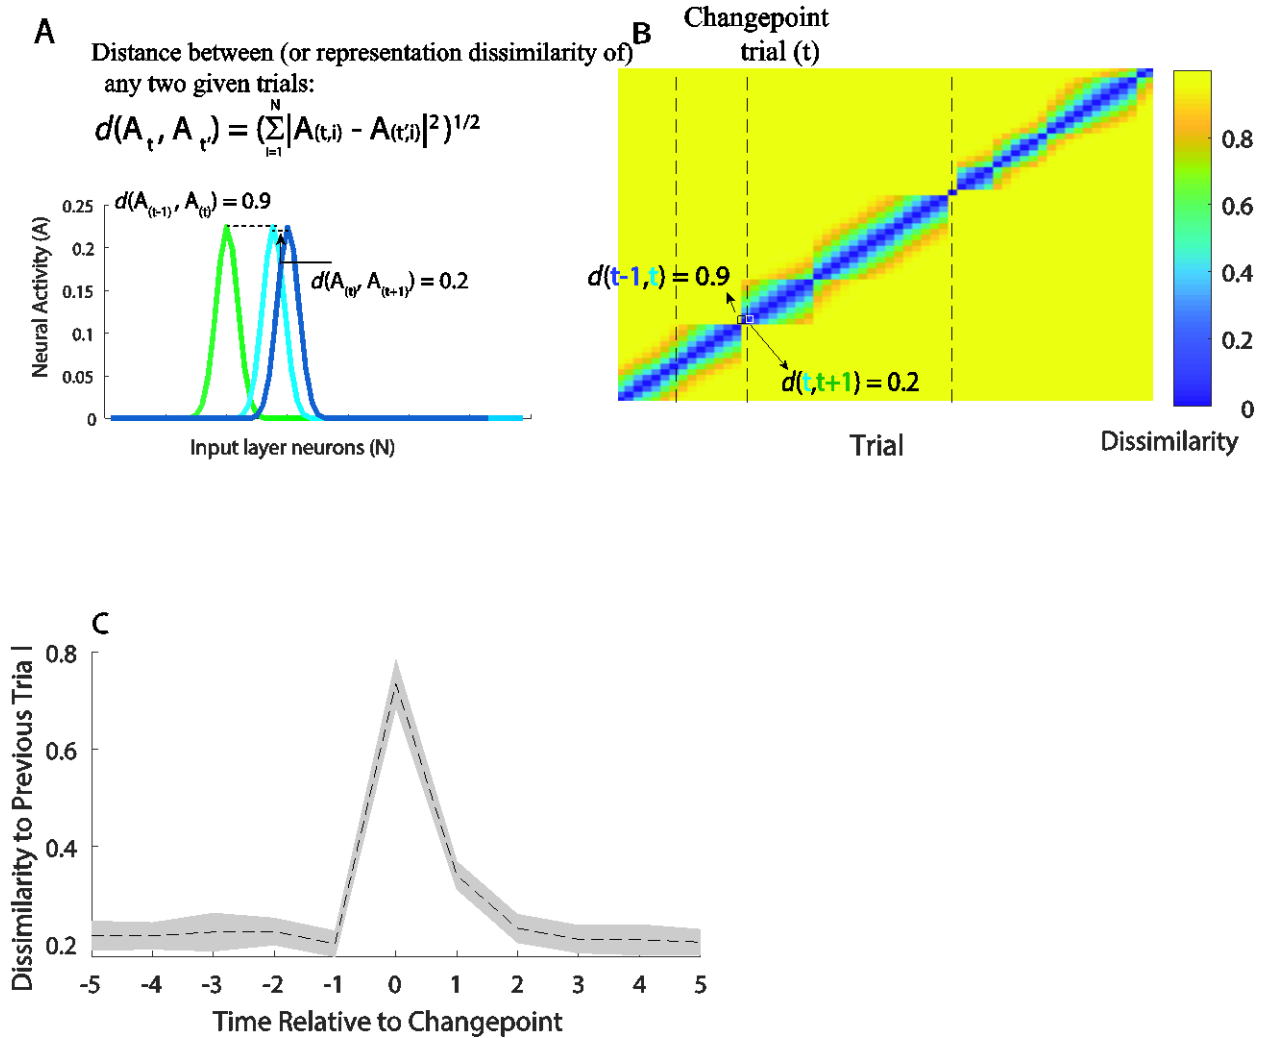

626  
 627 **Figure 5: Input layer representations change rapidly at changepoints.** A) Dissimilarity in the input  
 628 representation between pairs of trials was computed according to the Euclidean distance between those trials in the  
 629 space of population activity (here exemplified in terms of three trials, where trial t is an example changepoint). Note  
 630 that the cyan activity bump corresponding to trial t is shifted relative to the green bump corresponding to trial t-1  
 631 (green). B) A dissimilarity matrix representing the dissimilarity in input layer activity for each pair of trials in a  
 632 simulated task session. Dotted lines reflect changepoints, and thus trials between the dotted lines occurred in the same  
 633 task context (helicopter position). Note that trials within the same context (i.e. trial t and trial t+1) are more similar  
 634 than for consecutive trials belonging to two different contexts (trial t-1 and trial t). C) Mean/SEM (dotted line/shading)  
 635 dissimilarity between adjacent trials (ordinate) is plotted across trials relative to changepoint events (abscissa) for 32

727 simulated sessions. Note the rapid change in input layer activity profiles (i.e. high adjacent trial dissimilarity) at the  
728 changepoint event, reminiscent of previously observed “network reset” phenomena that have been linked to periods  
729 of rapid learning in both rodents and humans.

729

### 730 *Dynamic context shifts can reduce learning from oddballs*

731 In order to understand how dynamic context shifts might be employed to improve learning in an alternate  
732 statistical environment we considered a set of “oddball” generative statistics that have recently been  
733 employed to investigate neural signatures of learning (D’Acromont & Bossaerts, 2016; Nassar, Bruckner,  
734 et al., 2019). In the oddball condition, the mean of the output distribution does not abruptly change but  
735 instead gradually drifts according to a random walk. However, on occasion a bag is dropped at a random  
736 location uniformly sampled across the width of the screen with no relationship to the helicopter, constituting  
737 an outlier unrelated to both past and future outcomes. In the presence of such oddballs, large prediction  
738 errors should lead to less, rather than more, learning. This normative behavior has been observed in adult  
739 human subjects (D’Acromont & Bossaerts, 2016; Nassar, Bruckner, et al., 2019; Nassar & Troiani, 2020).

740 To examine whether dynamic context transitions could afford adaptive learning in the oddball condition  
741 we created a network analogous to the ground truth model described above, but active input units were  
742 adjusted according to the oddball condition transition structure (figure 6a)). Specifically, on each trial, the  
743 model would shift the context with a small constant rate, corresponding to the drift rate in the generative  
744 process (i.e. the helicopter position slowly drifting from trial to trial). On oddball trials, the model would  
745 undergo a large context shift, ensuring that the oddball outcome would be associated with a non-overlapping  
746 set of input layer neurons, in much the same way as for changepoint observations in our previous model.  
747 However, the model was also endowed with knowledge of the transition structure of the task, which  
748 includes that oddballs are typically followed by non-oddball trials, and as such, the input layer activity  
749 bump would transition to its previous non-oddball location subsequent to learning from the oddball outcome  
750 (L. Q. Yu et al., 2021). Consequently, the learned associations from oddball trials would not be stored in  
751 the same context as the ordinary trials, and predictions were always made from the previous “non-oddball”  
752 context – thereby minimizing the degree to which oddballs contribute to behavior.

753 Like in the changepoint condition, we also created versions of the model in which oddballs were inferred  
754 probabilistically using either a Bayesian inference model or the activity profile of the output units. Oddball  
755 probabilities (computed either from the normative model or the network’s output activity itself) were then  
756 used to guide transitions of the active input layer units (figure 6b). In these models the probability of an  
757 oddball event drove immediate transitions of the active input layer units to facilitate storage of information  
758 related to oddballs in a separate location, but subsequent predictions were always made from the input units  
759 corresponding to the most recent non-oddball event (plus a constant expected drift). These models achieved  
760 significantly better overall performance than the best fixed context shift model and similar performance to  
761 the ground truth context shift model (figure 6c&d). The advantage conferred through dynamic context shifts  
762 was specific to the oddball structural assumptions, as a model that employed dynamic context shifts based  
763 on the changepoint generative structure yielded worse performance than fixed context shift models (figure  
764 6c&d, red). It is noteworthy that, given the appropriate structural representation, the dynamic context shift  
765 model produced normative behavior in changepoint condition, where it increased learning by sustaining the  
766 newly activated context, but produced normative learning in the oddball context (decreasing learning on  
767 oddball trials) by immediately abandoning the new context in favor of the more “typical” one.

768

769

670 *Dynamic context shifts explain bidirectional learning signals observed in the brain*

671 A primary objective in this study was to identify the missing link between the algorithms that afford  
672 adaptive learning in dynamic environments and their biological implementations. One key challenge to  
673 forging such a link has been the contextual sensitivity of apparent “learning rate” signals observed in the  
674 brain. For example, in EEG studies the P300 associated with feedback onset positively predicts behavioral  
675 adjustments in static or changing environments (Fischer & Ullsperger, 2013; Jepma et al., 2018, 2016), but  
676 negatively predicts behavioral adjustments in the oddball condition that we describe above (Nassar,  
677 Bruckner, et al., 2019). These bidirectional relationships are strongest in people who adjust their learning  
678 strategies most across conditions, and persist even after controlling for a host of other factors related to  
679 behavior, suggesting that they are actually playing a role in learning, albeit a complex one (Nassar,  
680 Bruckner, et al., 2019).

681 Here we propose an alternative mechanistic role for the P300: that it reflects the need for a context shift.  
682 Our model provides an intuition for why such a signal might yield the previously observed bidirectional  
683 relationship to learning. A stronger P300 signal, corresponding to a larger context shift, would result in a  
684 stronger partition between current learning and previously learned associations. In changing environments,  
685 this could effectively increase learning, as it would decrease the degree to which prior experience is  
686 reflected in the weights associated with the currently active input units. In the oddball environment, where  
687 context changes *prevent* oddball events from affecting weights of the relevant input layer units, we would  
688 make the opposite prediction. We tested this idea directly in our model by measuring the effective learning  
689 rate in the dynamic context shift model for bins of trials sorted according to the magnitude of context shift  
690 that was used for them. The results of this analysis revealed a positive relationship between the context shift  
691 employed by the model and its effective learning rate in the changepoint condition, but a negative  
692 relationship between context shift and learning rate in the oddball condition (figure 6e). This result is  
693 qualitatively similar to empirically observed bidirectional relationships between learning and the P300  
694 (figure 6f). Thus, our results are consistent with the possibility that the P300 relates to learning indirectly,  
695 by signaling or promoting transitions in a mental context representation that effectively partition learning  
696 across context boundaries, including changepoints and oddballs.

697 *Relationship between context shifts and pupil diameter response:*

698 One major theory of learning has suggested that adaptive learning is facilitated by fluctuations in arousal  
699 mediated by the LC/NE system (A. J. Yu & Dayan, 2005). This idea has been supported by evidence from  
700 transient pupil dilations, which in animals are linked to LC/NE signaling (Joshi & Gold, 2020; Reimer et  
701 al., 2016), and are positively related to learning in changing environments (Nassar et al., 2012).  
702 Nonetheless, these results are difficult to interpret in light of another study that employed both changepoints  
703 and oddballs and observed the opposite relationship between pupil dilation and learning (O’Reilly et al.,  
704 2013). The contextual link between pupil diameter and learning may have a common biological origin to  
705 that of the P300 signal explored above, as the signals share a host of common antecedents and have both  
706 been proposed to reflect transient LC/NE signaling (Joshi & Gold, 2020; Nieuwenhuis, De Geus, & Aston-  
707 Jones, 2011; Vazey & Aston-Jones, 2014). In contrast to learning theories, another prominent theory has  
708 suggested that the LC/NE system plays a role in resetting ongoing context representations (Network reset  
709 hypothesis; Bouret & Sara, 2005), which maps well onto the context shift signals that our model requires  
710 to adjust effective learning rates.

711 Here we formalize the network reset hypothesis in terms of context transitions in our model, and explore  
712 the predictions of this formalization for the relationship between pupil diameter and learning. Specifically,  
713 we consider the possibility that LC/NE system is related to the instantaneous context shifts in our model,

714 and that pupil dilations occur as a delayed and temporally smeared version of this LC/NE signal (see  
715 methods). In this framework we might consider two distinct influences on the pupil diameter. First, the  
716 context shifts elicited by observations that deviate substantially from expectations, which might reflect  
717 either changepoints or oddballs depending on the statistical context (figure 7a, purple observation  
718 highlighted in green box). Second, the context shift required to “return” to the previous context after a likely  
719 oddball event, which must occur after processing feedback from a given trial, but before the start of the  
720 next trial (figure 7a, red box). Jointly considering transitions at these two discrete timepoints yields the  
721 prediction both changepoints and oddball events should lead to pupil dilations, but that these dilations  
722 should be prolonged in the oddball condition (figure 7b). We regressed these pupil signals onto an  
723 explanatory matrix that included model-derived measures of learning (trial-wise empirically derived  
724 learning rate) and surprise (estimated changepoint/oddball probability) to better understand their  
725 relationship to behavior. The results from this simulation yielded a positive relationship between our  
726 modeled pupil signal and surprise, but a late negative relationship between pupil diameter and learning (Fig  
727 7c). These results are generally in agreement with O’Reilly 2013, and support the possibility that pupil  
728 diameter reflects a temporally extended indicator of the context transitions predicted by our model.

729

730

731

732

733

734

735



Figure 6

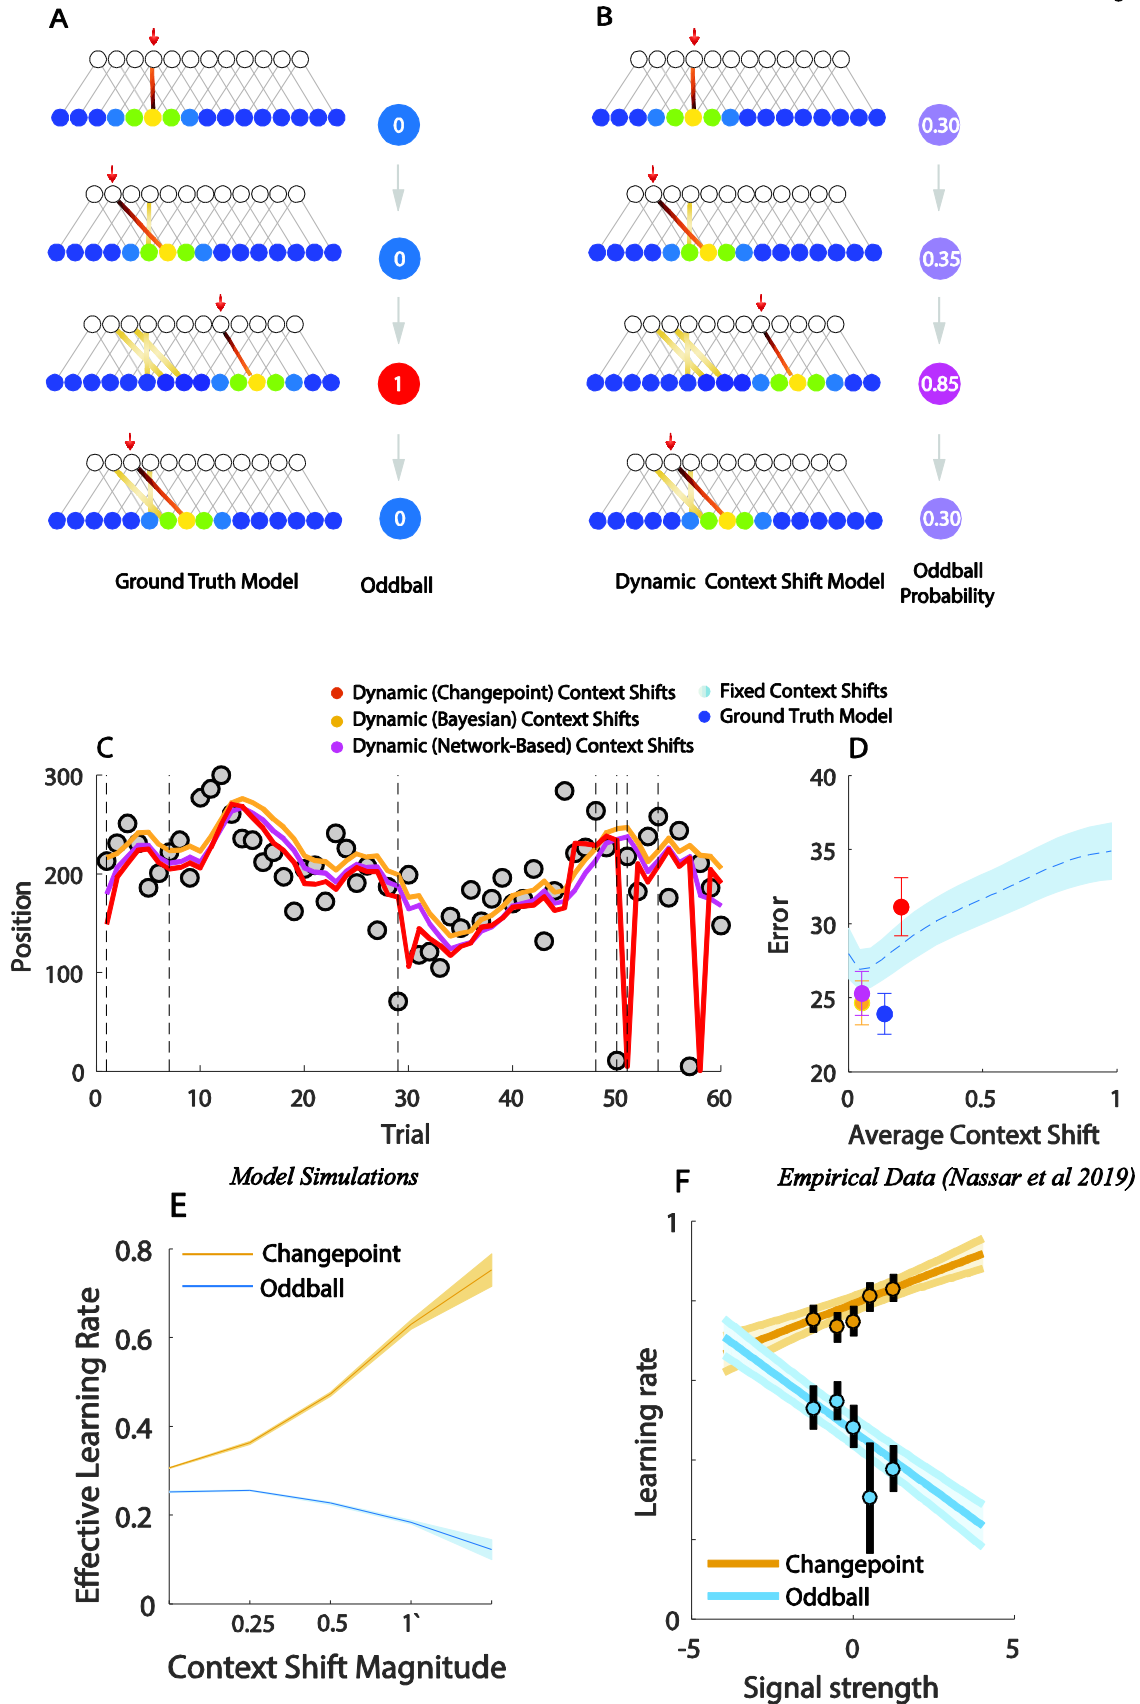

737 **Figure 6 – Dynamic context shifts facilitate adaptive learning in presence of oddballs.** A) Schematic  
738 representation of the ground truth model for the oddball environment, which has a constant context shift proportionate  
739 to the environmental drift. On oddball trials (third row) there is a large context shift, but context on next trial returns  
740 to its pre-oddball activity pattern. B) Schematic of the dynamic context shift model for the oddball task, which on each  
741 trial shifts the context according to oddball probability (OBP), but after receiving the supervised learning signal from  
742 the outcome, returns to its pre-oddball context, plus a small shift to account for the constant drift in helicopter position.  
743 Thus, context representations drift slowly on each trial, much as the helicopter position drifts. However, a trial with  
744 high oddball probability will cause the supervised signal to be stored in a completely separate context, and since  
745 context is reset to the previous value before the subsequent trial, any learning done from probable oddball events will  
746 not affect behavior on the subsequent trial. C) Example predictions of the two dynamic context shift models (pink &  
747 yellow) across 60 trials of the oddball condition compared to with the changepoint version of dynamic context shift  
748 model (red). Note that the oddball dynamic context shift models (pink & yellow) do not react to deviant outcomes  
749 (gray points) whereas the model that employs changepoint generative assumption (red) completely adjusts predictions  
750 after experiencing a deviant outcome. D) The dynamic context shift models had better aggregate performance than  
751 the best fixed context shift model (*Bayesian Context Shift Model*:  $t = 9.22$ .  $df = 31$ .  $p = 2.13 \times$   
752  $10^{-10}$ . *Network – Based Model*:  $t = 7.85$ .  $df = 31$ .  $p = 7.2 \times 10^{-9}$ ), and approached the performance of the  
753 ground truth model. E) Effective learning rate for the network-based context shift model (ordinate) was computed for  
754 subsets of simulated trials selected according to the magnitude of context shifts on those trials (abscissa) separately  
755 for changepoint (yellow) and oddball (blue) tasks. Note that larger context shifts in the changepoint condition  
756 correspond with greater learning, but in the oddball correspond with less learning. F) Effective learning rate computed  
757 for human participants (ordinate; Nassar 2019) in binned according to the magnitude of feedback-locked P300 EEG  
758 signal on that trial (abscissa) separately for changepoint (blue) and oddball (yellow) task conditions. Note qualitative  
759 similarity between the empirical observations related to the P300 signal and our models predictions regarding context  
760 shift magnitude.

761

762

763

764

765

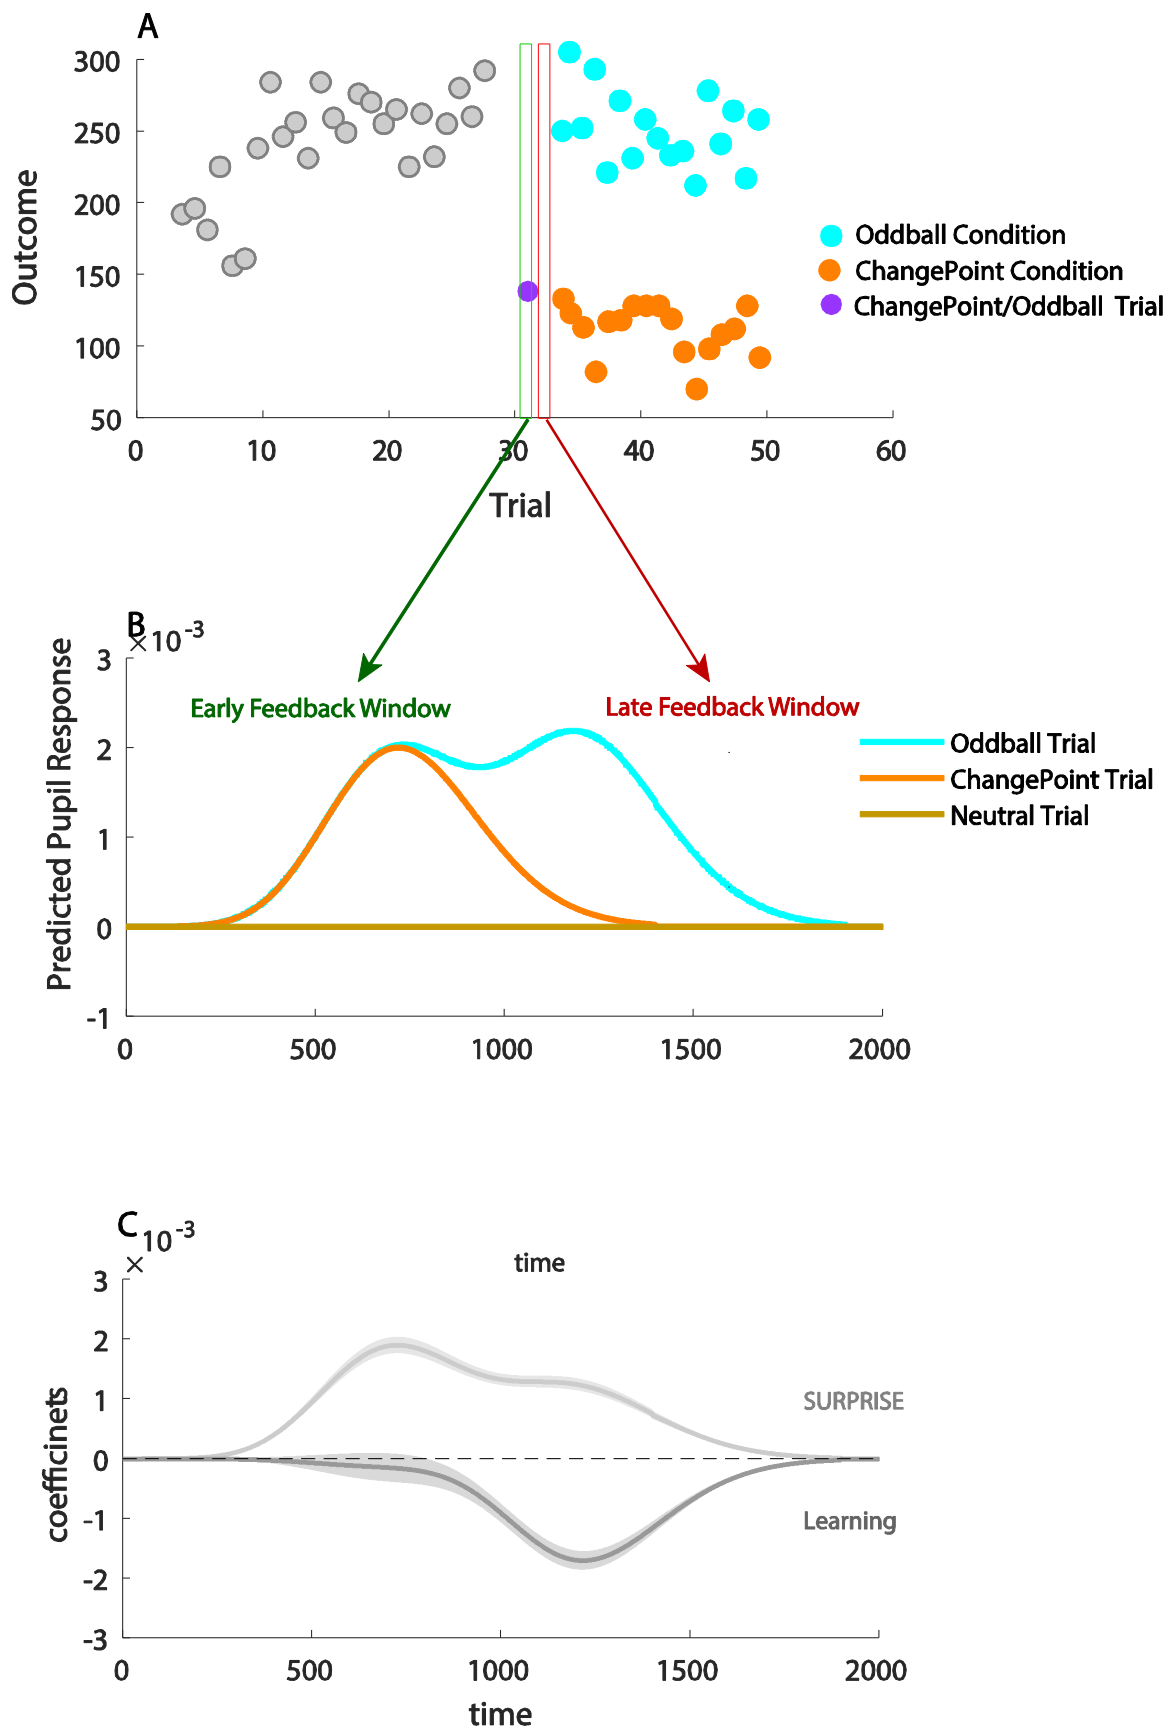

767 **Figure 7 -- Pupil responses simulated to reflect context shifts at multiple timepoints within a trial positively**  
768 **reflect surprise and negatively reflect learning across changepoint and oddball conditions.** A) An example set of  
769 outcomes (ordinate) over trials (abscissa) is depicted to demonstrate the key difference between the changepoint  
770 (orange) and oddball (cyan) generative structures. Based our dynamic and network-based context shift models  
771 predictions, a surprising outcome is accompanied by a context shift in both the changepoint and oddball conditions  
772 (green box). A second context shift is predicted to happen only in the oddball condition in the inter-trial interval after  
773 experiencing an oddball event (red box), corresponding to the expected return to the more typical context (cyan points).  
774 B) Predicted pupil responses (ordinate) are plotted over time (abscissa) for three trial types (colors). Pupil responses  
775 were simulated as the convolution of a gamma function with the expected context shift on each trial at two discrete  
776 time points. The first occurred at 400 ms after observing the outcome, and context shifts at this time point were  
777 proportional to changepoint probability/oddball probability in our model; the second time point was at 900ms after  
778 the outcome when subjects would be expected to begin preparing a prediction for the next trial outcome, the context  
779 shifts at this time point were proportional to the inter-trial-interval context shifts necessary to return to the “typical”  
780 context after an oddball trial. Based on predictions of our model, a context shift should occur at the first time point in  
781 both changepoint and oddball trials while a context shift at the second timepoint should only to happen at the oddball  
782 condition. C) Simulated pupil responses positively reflect surprise early after feedback (light gray) but negatively  
783 reflect learning during a later time window (dark gray). Coefficients for learning and surprise were obtained by  
784 regressing simulated pupil responses onto an explanatory matrix that contained regressors capturing surprise  
785 (changepoint/oddball probability) and learning (dynamic trial-by-trial learning rate) as estimated by a reduced  
786 Bayesian model.  
787  
788

## 789 Discussion

790 Existing models of adaptive learning have failed to capture the range of behaviors in humans across  
791 different statistical environments and their underlying neural correlates. Here we developed a neural  
792 network framework and demonstrated that internal context shifts within this framework provide a flexible  
793 mechanism through which learning rate can be adjusted. Within this test bed we demonstrate that abrupt  
794 transitions in context, triggered by unexpected outcomes, can facilitate improved performance in two  
795 different statistical environments that differ in the sort of adaptive learning that they require, and do so in a  
796 manner that mimics human behavior. Context representations from this dynamic model provide a  
797 mechanistic interpretation of activity patterns previously observed in orbitofrontal cortex that abruptly  
798 change during periods of rapid learning. The context shift signal, which allows the model to adjust context  
799 representations dynamically in order to afford adaptive learning behaviors, provides a mechanistic  
800 interpretation for feedback locked P300 signals that conditionally predict learning, and may also resolve a  
801 contradiction in different studies examining the relationship between pupil dilation and learning. Taken  
802 together, our results provide a mechanistic explanation for adaptive learning behavior and the signals that  
803 give rise to it, and furthermore suggest that apparent adjustments in “how much” to learn may actually  
804 reflect the dynamics controlling “where” learning takes place.

805 The input layer that our model employs for flexible learning builds on the notion of latent states for  
806 representation learning. Through this lens, our work can be thought of as an extension to a larger body of  
807 research on structure learning, much of which has focused on identifying commonalities across stimulus  
808 categories (A. G. E. Collins & Frank, 2013; Gershman & Niv, 2010). In cases where temporal dynamics  
809 have been explored, the focus has been on the degree to which latent states allow efficient pooling of  
810 information across similar contexts that are separated in time (A. G. E. Collins & Frank, 2013; Gershman,  
811 Blei, & Niv, 2010; Wilson, Takahashi, Schoenbaum, & Niv, 2014). Here we highlight another advantage  
812 of using temporal dynamics to control active state representations: efficient partitioning of information in  
813 time to prevent interference. In addition to highlighting this advantage, our results highlight a shared  
814 anatomical basis for state representations across different types of tasks. Patterns of input layer activity in  
815 our model transition rapidly after changepoints to facilitate adaptive learning, much like network reset

phenomena that have been observed in medial prefrontal cortex in rodents and orbitofrontal cortex (OFC) in humans (Karlsson et al., 2012; Nassar, Bruckner, et al., 2019). Rapid transitions in OFC are particularly interesting given that this area has been suggested to represent latent states for sharing knowledge across common structures (Schuck, Cai, Wilson, & Niv, 2016; Wilson et al., 2014). The existence of coordinated changes in neural activity patterns in brain regions thought to reflect provides support for our assumption that associations are controlled through changes in the pattern of active input units over time (e.g. figure 3), rather than alternative accounts in which associations are selectively attributed to only a subset of active units through synchronization (Verbeke & Verguts, 2019), although these two mechanisms need not be mutually exclusive.

Our model description shares some mechanistic similarities with temporal context models (TCM) of episodic and sequential memory recall. (DuBrow, Rouhani, Niv, & Norman, 2017; Franklin et al., 2020; Howard & Kahana, 2002; Kornysheva et al., 2019; Polyn, Norman, & Kahana, 2009; Shankar, Jagadisan, & Howard, 2009). In temporal context models, there is a gradual change in context activity that occurs through passage of time or a through learned linear mapping of the stimuli to contexts, however our dynamic model relies on discontinuous changes in context more analogous to the underlying latent state dynamics and provides a normative rationale for such abrupt transitions at surprising events, namely that such transitions promote pooling of relevant information within a context (figure 3d) and partitioning of information across contexts (figure 3c) in order to improve inference in complex and dynamic environments (figure 3e & figure 6d). These modeling assumptions allowed us to capture prediction behavior in changepoint and oddball conditions – but to capture a more general set generative statistics – our model would also need to incorporate the possibility of returning to a previous context, and thus considering a hybrid between the assumptions in our model and those of the temporal context models might be an interesting avenue for future study.

More recently, extensions of the temporal context models have suggested the existence of event boundaries which cause discontinuity in temporal context (Zacks, Speer, Swallow, Braver, & Reynolds, 2007). The emergence of these boundaries has been attributed to errors in predictions which, analogous to detected outliers in our model, cause the subsequent observations to be stored in a different context (DuBrow & Davachi, 2013; Rouhani, Norman, Niv, & Bornstein, 2020). Such segmented events also lead to more dissociable representations in fMRI (Antony et al., 2020; Baldassano et al., 2017; Lositsky et al., 2016). While these interpretations of discontinuity in memory are closely related to our model, we take a step further by assigning a key role to such segmentations. In particular, our model shows that it is useful to segment internal context representation after a surprising event in order to improve predictions.

An important question here is how to quantitatively control the transition to new contexts, particularly when such context transitions are not overtly signaled. In previous computational models of event segmentation, surprise has been suggested as the main factor controlling such transition probabilities (Schapiro, Rogers, Cordova, Turk-Browne, & Botvinick, 2013). Our dynamic context shift model uses surprise, as indexed by the probability of an unexpected event (changepoint/oddball), to control context shifts. Such probabilities can be inferred using a Bayesian learning model calibrated to the environmental structure, however, we show that they could also be estimated from output layer of our network itself. Previous work has suggested that changepoint and oddball probability are reflected by BOLD activations in both cortical and subcortical regions (D'Acromont & Bossaerts, 2016; Kao et al., 2020; McGuire et al., 2014; Meyniel & Dehaene, 2017; Nassar, McGuire, et al., 2019; Nassar et al., 2012; O'Reilly et al., 2013; A. J. Yu & Dayan, 2005). While such signals have previously been interpreted as early-stage computations performed in the service of computing a learning rate, our work suggests that they serve another purpose, namely in signaling the need to change the active context representation. This interpretation would be consistent with the observation

that in at least one case, BOLD responses to surprising events look quite similar across behavioral contexts in which such events should be either learned from, or ignored (D’Acromont & Bossaerts, 2016).

The need for knowledge of transition structure in our model also raises the question of where this information comes from. We speculate that, in the brain, this transition structure might be provided by a separate set of neural systems that includes the medial temporal lobe (MTL). This speculation is based on 1) the observation that our context representations mirror the dynamics of representations in orbitofrontal cortex (figure 5), 2) that OFC receives strong inputs from the medial temporal lobe (MTL) (Wikenheiser & Schoenbaum, 2016), and 3) the important role played by the MTL in model based learning and planning (Mattar & Daw, 2018; Schuck & Niv, 2019; Vikbladh et al., 2019). However, future work examining adaptive learning behavior in the face of ambiguous transition structures may help to tease apart the functional roles of different brain signals that occur at surprising task events (Bakst & McGuire, 2020).

Of particular interest in this regard is the feedback-locked P300 signal, an EEG-based correlate of surprise in humans (Kolossa, 2016; Kopp et al., 2016; Mars et al., 2008). A recent study showed that this signal positively related to learning in a changing environment and negatively related to learning in one containing oddballs (Nassar, Bruckner, et al., 2019). Here we show that the context shift variable in our dynamic model has the exact same bidirectional relationship to learning. In our model this reflects a causal relationship, whereby context transitions that persist in the changepoint condition lead new observations to have greater behavioral impact (i.e. more learning; figure 6e), and transient context transitions in the oddball condition limit the behavioral impact of oddball events by associating them with a different context from the one in which predictions are generated (i.e. less learning; figure 6e). We note that this distinction relies in part on our definition of learning. In reality, our model makes the same sorts of weight adjustments for both situations, yet the situations differ in the degree to which those weight adjustments impact future predictions.

This bidirectional adjustment of learning rate is a key prediction of our model. We also predict that other physiological measures of surprise that have previously been related to learning, such as pupil diameter, should also provide similar results in environments with different sources of surprising outcomes. However, a key difference of pupil dilation predictions is that given the slow time course of the pupil signal, we predict that it will aggregate multiple state transitions that can occur on an oddball trial (i.e. the transition away from the original state to a new one, and the transition back to the original state). This aspect of the signaling predicts heightened pupil dilations on oddball relative to changepoint trials, which agrees qualitatively with previous observations (O’Reilly et al., 2013), and may help to resolve confusion in the existing literature regarding the relationship between pupil dilations and behavioral adjustment (Nassar et al., 2012; O’Reilly et al., 2013). Our model predicts that such a signal should also drive changes in state representations in OFC. This prediction, at least in part, is consistent with another recent experiment on neuromodulatory control of uncertainty (Muller et al., 2019), in which the strength of pupil dilation predicts the level of uncertainty regarding the current state of the environment, represented in medial orbitofrontal cortex. Our model predicts that these relationships should also depend on the task structure, with state transitions driving OFC representations toward an alternative state in reversal tasks (Muller et al., 2019) toward a completely new persisting state in changepoint tasks (Nassar, McGuire, et al., 2019) and toward a transient state after oddball events. These relationships between state transition signals and neural representations have yet to be measured across the range of contexts that would be necessary to fully test our models predictions, and thus is an interesting avenue for future empirical work.

A major implication of our findings is that behavioral markers of learning rate adjustment may be produced by a network that relies on a fixed learning rate (the rate of synaptic weight changes), so long as that network

906 adjusts its own internal representations according to the structure of the environment. This is also what  
907 distinguishes our model from other accounts of behavior (Nassar et al., 2012, 2010) that adjust learning rate  
908 directly, or from computational models that have used surprise detection signals to control learning rate at  
909 the synaptic level (Iigaya, 2016). By introducing context shifts in our model we were able to build a  
910 mechanistic role for surprise in a learning algorithm that can explain the conditional nature of heretofore  
911 identified learning rate signals: they are actually signaling state transitions, rather than learning per se.

912 Our model opens the door for a number of future investigations. We catered our analysis to the behavioral  
913 experiments of Nassar et al 2019 (Nassar, Bruckner, et al., 2019; Nassar, McGuire, et al., 2019), and  
914 therefore only considered changepoint and oddball conditions but did not study the case where context  
915 could either shift to a new context or return to a previous context it has learned before. Recognizing that a  
916 new observation actually comes from a previously learned context would involve additional pattern  
917 recognition and memory retrieval mechanisms (Redish, Jensen, Johnson, & Kurth-nelson, 2007), which  
918 might be thought of as part of a more general model-based inference framework as described above  
919 (Franklin, Norman, Ranganath, Zacks, & Gershman, 2020; Whittington et al., 2019). That is to say, in order  
920 to solve all types of real-world problems, our model would be required to know not only that an observation  
921 is different from the recent past, but also which previously encountered state would provide the best  
922 generalization to this new situation. Doing so effectively would require organization of states based on  
923 similarity, such that similar states shared learning to some degree, in the same way that states which occur  
924 nearby in time pool learning in our current model.

#### 925 *Model limitations*

926 The design of our network has several limitations that would need to be overcome to fully realize the  
927 potential of our overarching framework. The first is that our network was endowed with knowledge of the  
928 task transition structure – raising an important question for future work as to how this structure could be  
929 learned directly from observations. In our tasks the transition structure differed between changepoints and  
930 oddballs, with changepoints promoting persisting state representations and oddballs promoting an  
931 immediate transition back to the previous state, however real-world learning occurs in a much more  
932 diverse set of environments, where simultaneously learning transition structure and applying it to guide  
933 behavioral adjustment would be challenging to say the least.

934 A second set of limitations stems from our simplified ring organization of the input (context) layer of our  
935 network. This simplification causes potential issues for the oddball condition we model, in that future  
936 contexts could rely on the same input units that were previously associated with oddball events. In our  
937 simplified network we solved this problem through slow weight decays that slowly turn unused input  
938 units into blank slates for future learning. However, we suspect that the brain uses a different solution,  
939 namely a more complex organization of context representations – for example if the input layer were two  
940 dimensional, with one dimension corresponding to slow drifts and the other corresponding to oddball  
941 events, an oddball context could never be encountered with any amount of drift.

942 Another set of limitations would emerge if our model were required to re-use previously encountered  
943 input representations to transfer knowledge about a repeated context. This situation would present two  
944 main challenges to our current network design. The first is that the weight decay mechanisms in our  
945 network would erase memories from previously visited contexts. This limitation could be overcome by  
946 eliminating weight decay mechanisms and instead equipping the network with a relatively large number  
947 of input units to prevent interference (see supplementary figure 4 at  
948 [github.com/NassarLab/dynamicStatesLearning](https://github.com/NassarLab/dynamicStatesLearning)). Although increasing the number of input units provides  
949 a reasonable solution for our toy problems, this solution may not scale for life-long learning, where the

900 number of unique contexts may approach the number of unique mental context representations – raising  
901 an important question for future research. A second challenge for our model in repeating contexts would  
902 be to identify the input units that should be active in response to a previously encountered state. Our  
903 model was given transition structure for the environments we examined (changepoints/oddballs), and this  
904 transition structure controlled how input layer activations were updated in each environment. In  
905 principle, state update rules could be derived for repeating contexts in much the same way, by first  
906 deriving Bayesian estimates of context probability (A. Collins & Koechlin, 2012) and then approximating  
907 these values using the network output (analogous to our network-based context shift model). We hope  
908 that our model inspires future work to examine this idea in more detail.

909

## 910 Summary

911

912 In summary, we suggest that flexible learning emerges from dynamic internal context representations that  
913 are updated in response to surprising observations in accordance with task structure. Our model requires  
914 representations consistent with those that have previously been observed in orbitofrontal cortex as well as  
915 state transition signals necessary to update them. We suggest that biological signals previously thought to  
916 reflect “dynamic learning rates” actually signal the need for internal state transitions, and our model  
917 provides the first mechanistic explanation for the context-dependence with which these signals relate to  
918 learning. Taken together, our results support the notion that adaptive learning behaviors may arise through  
919 dynamic control of representations of task structure

920

## 921 Data Availability

922 All analysis and modeling code (including code for generating the figures) has been made available on  
923 GitHub: [github.com/NassarLab/dynamicStatesLearning](https://github.com/NassarLab/dynamicStatesLearning).

924

925

## 926 References:

- 927 Adams, R. P., & MacKay, D. J. C. (2007). *Bayesian Online Changepoint Detection*. Retrieved from  
928 <http://arxiv.org/abs/0710.3742>
- 929 Antony, J. W., Hartshorne, T. H., Pomeroy, K., Gureckis, T. M., Hasson, U., McDougle, S. D., &  
930 Norman, K. A. (2020). Behavioral, physiological, and neural signatures of surprise during  
931 naturalistic sports viewing. *BioRxiv*, 2020.03.26.008714. <https://doi.org/10.1101/2020.03.26.008714>
- 932 Bakst, L., & McGuire, J. (2020). Eye movements reflect adaptive predictions and predictive precision.  
933 *Journal of Experimental Psychology: General*. <https://doi.org/10.1037/xge0000977>
- 934 Baldassano, C., Chen, J., Zadbood, A., Pillow, J. W., Hasson, U., & Norman, K. A. (2017). Discovering  
935 Event Structure in Continuous Narrative Perception and Memory. *Neuron*, 95(3), 709-721.e5.  
936 <https://doi.org/10.1016/j.neuron.2017.06.041>
- 937 Behrens, T. E. J., Woolrich, M. W., Walton, M. E., & Rushworth, M. F. S. (2007). *Learning the value of*  
938 *information in an uncertain world*. 10(9), 1214–1221. <https://doi.org/10.1038/nn1954>



- 989 Bernacchia, A., Seo, H., Lee, D., & Wang, X.-J. (2011). A reservoir of time constants for memory traces  
990 in cortical neurons. *Nature Neuroscience*, *14*(3), 366–372. <https://doi.org/10.1038/nn.2752>
- 991 Botvinick, M. M., Braver, T. S., Barch, D. M., Carter, C. S., & Cohen, J. D. (2001). Conflict monitoring  
992 and cognitive control. *Psychological Review*, Vol. 108, pp. 624–652. <https://doi.org/10.1037/0033-295X.108.3.624>
- 993
- 994 Bouret, S., & Sara, S. J. (2005). Network reset: a simplified overarching theory of locus coeruleus  
995 noradrenaline function. *Trends in Neurosciences*, *28*(11), 574–582.  
996 <https://doi.org/10.1016/j.tins.2005.09.002>
- 997 Browning, M., Behrens, T. E., Jochem, G., O'Reilly, J. X., & Bishop, S. J. (2015). Anxious individuals  
998 have difficulty learning the causal statistics of aversive environments. *Nature Neuroscience*, *18*(4),  
999 590–596. <https://doi.org/10.1038/nn.3961>
- 1000 Cockburn, J., & Frank, M. (2013). Reinforcement Learning, Conflict Monitoring, and Cognitive Control:  
1001 An Integrative Model of Cingulate–Striatal Interactions and the ERN. *Neural Basis of Motivational  
1002 and Cognitive Control*, 310–331. <https://doi.org/10.7551/mitpress/9780262016438.003.0017>
- 1003 Collins, A. G. E., & Frank, M. J. (2013). Cognitive control over learning: creating, clustering, and  
1004 generalizing task-set structure. *Psychological Review*, *120*(1), 190–229.  
1005 <https://doi.org/10.1037/a0030852>
- 1006 Collins, A., & Koechlin, E. (2012). Reasoning, learning, and creativity: Frontal lobe function and human  
1007 decision-making. *PLoS Biology*, *10*(3). <https://doi.org/10.1371/journal.pbio.1001293>
- 1008 D'Acromont, M., & Bossaerts, P. (2016). Neural Mechanisms behind Identification of Leptokurtic Noise  
1009 and Adaptive Behavioral Response. *Cerebral Cortex*, *26*(4), 1818–1830.  
1010 <https://doi.org/10.1093/cercor/bhw013>
- 1011 Donahue, C. H., & Lee, D. (2015). Dynamic routing of task-relevant signals for decision making in  
1012 dorsolateral prefrontal cortex. *Nature Neuroscience*, *18*(2), 295–301.  
1013 <https://doi.org/10.1038/nn.3918>
- 1014 DuBrow, S., & Davachi, L. (2013). The influence of context boundaries on memory for the sequential  
1015 order of events. *Journal of Experimental Psychology: General*, *142*(4), 1277–1286.  
1016 <https://doi.org/10.1037/a0034024>
- 1017 Farashahi, S., Donahue, C. H., Hayden, B. Y., Lee, D., & Soltani, A. (2019). Flexible combination of  
1018 reward information across primates. *Nature Human Behaviour*, *3*(11), 1215–1224.  
1019 <https://doi.org/10.1038/s41562-019-0714-3>
- 1020 Farashahi, S., Donahue, C. H., Khorsand, P., Seo, H., Lee, D., & Soltani, A. (2017). Metaplasticity as a  
1021 Neural Substrate for Adaptive Learning and Choice under Uncertainty. *Neuron*, *94*(2), 401–414.e6.  
1022 <https://doi.org/10.1016/j.neuron.2017.03.044>
- 1023 Fischer, A. G., & Ullsperger, M. (2013). Real and Fictive Outcomes Are Processed Differently but  
1024 Converge on a Common Adaptive Mechanism. *Neuron*, *79*(6), 1243–1255.  
1025 <https://doi.org/10.1016/j.neuron.2013.07.006>
- 1026 Franklin, N. T., Norman, K. A., Ranganath, C., Zacks, J. M., & Gershman, S. J. (2020). Structured Event  
1027 Memory: A neuro-symbolic model of event cognition. *Psychological Review*, *127*(3), 327–361.  
1028 <https://doi.org/10.1037/rev0000177>
- 1029 Gershman, S. J., Blei, D. M., & Niv, Y. (2010). Context, Learning, and Extinction. *Psychological Review*,  
1030 Vol. 117, pp. 197–209. Retrieved from

- 1.0.31 <https://nivlab.princeton.edu/sites/default/files/nivlab/files/gershmanetal2009.pdf>
- 1.0.32 Gershman, S. J., & Niv, Y. (2010). Learning latent structure: Carving nature at its joints. *Current Opinion*  
1.0.33 *in Neurobiology*, 20(2), 251–256. <https://doi.org/10.1016/j.conb.2010.02.008>
- 1.0.34 Iigaya, K. (2016). Adaptive learning and decision-making under uncertainty by metaplastic synapses  
1.0.35 guided by a surprise detection system. *ELife*, 5, e18073. <https://doi.org/10.7554/eLife.18073>
- 1.0.36 Jepma, M., Brown, S. B. R. E., Murphy, P. R., Koelewijn, S. C., de Vries, B., van den Maagdenberg, A.  
1.0.37 M., & Nieuwenhuis, S. (2018). Noradrenergic and Cholinergic Modulation of Belief Updating.  
1.0.38 *Journal of Cognitive Neuroscience*, 30(12), 1803–1820. [https://doi.org/10.1162/jocn\\_a\\_01317](https://doi.org/10.1162/jocn_a_01317)
- 1.0.39 Jepma, M., Murphy, P. R., Nassar, M. R., Rangel-Gomez, M., Meeter, M., & Nieuwenhuis, S. (2016).  
1.0.40 Catecholaminergic Regulation of Learning Rate in a Dynamic Environment. *PLOS Computational*  
1.0.41 *Biology*, 12(10), e1005171. Retrieved from <https://doi.org/10.1371/journal.pcbi.1005171>
- 1.0.42 Joshi, S., & Gold, J. I. (2020). Pupil Size as a Window on Neural Substrates of Cognition. *Trends in*  
1.0.43 *Cognitive Sciences*, 24(6), 466–480. <https://doi.org/10.1016/j.tics.2020.03.005>
- 1.0.44 Kao, C.-H., Khambhati, A. N., Bassett, D. S., Nassar, M. R., McGuire, J. T., Gold, J. I., & Kable, J. W.  
1.0.45 (2020). Functional brain network reconfiguration during learning in a dynamic environment. *Nature*  
1.0.46 *Communications*, 11(1), 1682. <https://doi.org/10.1038/s41467-020-15442-2>
- 1.0.47 Karlsson, M. P., Tervo, D. G. R., & Karpova, A. Y. (2012). Network Resets in Medial Prefrontal Cortex  
1.0.48 Mark the Onset of Behavioral Uncertainty. *Science*, 338(6103), 135 LP – 139.  
1.0.49 <https://doi.org/10.1126/science.1226518>
- 1.0.50 Kolossa, A. (2016). *A New Theory of Trial-by-Trial P300 Amplitude Fluctuations*.  
1.0.51 [https://doi.org/10.1007/978-3-319-32285-8\\_3](https://doi.org/10.1007/978-3-319-32285-8_3)
- 1.0.52 Kopp, B., Seer, C., Lange, F., Kluytmans, A., Kolossa, A., Fingscheidt, T., & Hooijink, H. (2016). P300  
1.0.53 amplitude variations, prior probabilities, and likelihoods: A Bayesian ERP study. *Cognitive,*  
1.0.54 *Affective, & Behavioral Neuroscience*, 16(5), 911–928. <https://doi.org/10.3758/s13415-016-0442-3>
- 1.0.55 Li, Y. S., Nassar, M. R., Kable, J. W., & Gold, J. I. (2019). Individual Neurons in the Cingulate Cortex  
1.0.56 Encode Action Monitoring, Not Selection, during Adaptive Decision-Making. *The Journal of*  
1.0.57 *Neuroscience*, 39(34), 6668 LP – 6683. <https://doi.org/10.1523/JNEUROSCI.0159-19.2019>
- 1.0.58 Lositsky, O., Chen, J., Toker, D., Honey, C. J., Shvartsman, M., Poppenk, J. L., ... Norman, K. A. (2016).  
1.0.59 Neural pattern change during encoding of a narrative predicts retrospective duration estimates.  
1.0.60 *ELife*, 5, e16070. <https://doi.org/10.7554/eLife.16070>
- 1.0.61 Mars, R. B., Debener, S., Gladwin, T. E., Harrison, L. M., Haggard, P., Rothwell, J. C., & Bestmann, S.  
1.0.62 (2008). Trial-by-Trial Fluctuations in the Event-Related Electroencephalogram Reflect Dynamic  
1.0.63 Changes in the Degree of Surprise. *The Journal of Neuroscience*, 28(47), 12539 LP – 12545.  
1.0.64 <https://doi.org/10.1523/JNEUROSCI.2925-08.2008>
- 1.0.65 Massi, B., Donahue, C. H., & Lee, D. (2018). Volatility Facilitates Value Updating in the Prefrontal  
1.0.66 Cortex. *Neuron*, 99(3), 598–608.e4. <https://doi.org/https://doi.org/10.1016/j.neuron.2018.06.033>
- 1.0.67 Mathys, C., Daunizeau, J., Friston, K. J., & Stephan, K. E. (2011). A bayesian foundation for individual  
1.0.68 learning under uncertainty. *Frontiers in Human Neuroscience*, 5, 39.  
1.0.69 <https://doi.org/10.3389/fnhum.2011.00039>
- 1.0.70 Mattar, M. G., & Daw, N. D. (2018). Prioritized memory access explains planning and hippocampal  
1.0.71 replay. *Nature Neuroscience*, 21(11), 1609–1617. <https://doi.org/10.1038/s41593-018-0232-z>

- 1072 McGuire, J. T., Nassar, M. R., Gold, J. I., & Kable, J. W. (2014). Functionally dissociable influences on  
1073 learning rate in a dynamic environment. *Neuron*, 84(4), 870–881.  
1074 <https://doi.org/10.1016/j.neuron.2014.10.013>
- 1075 Meyniel, F., & Dehaene, S. (2017). Brain networks for confidence weighting and hierarchical inference  
1076 during probabilistic learning. *Proceedings of the National Academy of Sciences of the United States*  
1077 *of America*, 114(19), E3859–E3868. <https://doi.org/10.1073/pnas.1615773114>
- 1078 Muller, T. H., Mars, R. B., Behrens, T. E., & O'Reilly, J. X. (2019). Control of entropy in neural models  
1079 of environmental state. *ELife*, 8, 1–30. <https://doi.org/10.7554/eLife.39404>
- 1080 Nassar, M. R., Bruckner, R., & Frank, M. J. (2019). Statistical context dictates the relationship between  
1081 feedback-related EEG signals and learning. *ELife*, 8, 1–26. <https://doi.org/10.7554/eLife.46975>
- 1082 Nassar, M. R., & Gold, J. I. (2010). *Supplementary Material for : Bayesian On-line Learning of the*  
1083 *Hazard Rate in Change-Point Problems*. 22(9), 2452–2476.
- 1084 Nassar, M. R., McGuire, J. T., Ritz, H., & Kable, J. W. (2019). Dissociable forms of uncertainty-driven  
1085 representational change across the human brain. *Journal of Neuroscience*, 39(9), 1688–1698.  
1086 <https://doi.org/10.1523/JNEUROSCI.1713-18.2018>
- 1087 Nassar, M. R., Rumsey, K. M., Wilson, R. C., Parikh, K., Heasley, B., & Gold, J. I. (2012). Rational  
1088 regulation of learning dynamics by pupil-linked arousal systems. *Nature Neuroscience*, 15(7), 1040–  
1089 1046. <https://doi.org/10.1038/nn.3130>
- 1090 Nassar, M. R., & Troiani, V. (2020). The stability flexibility tradeoff and the dark side of detail.  
1091 *Cognitive, Affective, & Behavioral Neuroscience*. <https://doi.org/10.3758/s13415-020-00848-8>
- 1092 Nassar, M. R., Waltz, J. A., Albrecht, M. A., Gold, J. M., & Frank, M. J. (2021). All or nothing belief  
1093 updating in patients with schizophrenia reduces precision and flexibility of beliefs. *Brain*.  
1094 <https://doi.org/10.1093/brain/awaa453>
- 1095 Nassar, M. R., Wilson, R. C., Heasley, B., & Gold, J. I. (2010). An approximately Bayesian delta-rule  
1096 model explains the dynamics of belief updating in a changing environment. *Journal of*  
1097 *Neuroscience*, 30(37), 12366–12378. <https://doi.org/10.1523/JNEUROSCI.0822-10.2010>
- 1098 Nieuwenhuis, S., De Geus, E. J., & Aston-Jones, G. (2011). The anatomical and functional relationship  
1099 between the P3 and autonomic components of the orienting response. *Psychophysiology*, 48(2),  
1100 162–175. <https://doi.org/10.1111/j.1469-8986.2010.01057.x>
- 1101 O'Reilly, J. X. (2013). Making predictions in a changing world-inference, uncertainty, and learning.  
1102 *Frontiers in Neuroscience*, 7(7 JUN), 1–10. <https://doi.org/10.3389/fnins.2013.00105>
- 1103 O'Reilly, J. X., Schüffelgen, U., Cuell, S. F., Behrens, T. E. J., Mars, R. B., & Rushworth, M. F. S.  
1104 (2013). Dissociable effects of surprise and model update in parietal and anterior cingulate cortex.  
1105 *Proceedings of the National Academy of Sciences of the United States of America*, 110(38).  
1106 <https://doi.org/10.1073/pnas.1305373110>
- 1107 Redish, A. D., Jensen, S., Johnson, A., & Kurth-nelson, Z. (2007). *Reconciling Reinforcement Learning*  
1108 *Models With Behavioral Extinction and Renewal : Implications for Addiction , Relapse , and*  
1109 *Problem Gambling*. 114(3), 784–805. <https://doi.org/10.1037/0033-295X.114.3.784>
- 1110 Reimer, J., McGinley, M. J., Liu, Y., Rodenkirch, C., Wang, Q., McCormick, D. A., & Tolias, A. S.  
1111 (2016). Pupil fluctuations track rapid changes in adrenergic and cholinergic activity in cortex.  
1112 *Nature Communications*, 7(1), 13289. <https://doi.org/10.1038/ncomms13289>

- 1113 Rouhani, N., Norman, K. A., Niv, Y., & Bornstein, A. M. (2020). Reward prediction errors create event  
1114 boundaries in memory. *Cognition*, 203, 104269.  
1115 <https://doi.org/https://doi.org/10.1016/j.cognition.2020.104269>
- 1116 Schapiro, A. C., Rogers, T. T., Cordova, N. I., Turk-Browne, N. B., & Botvinick, M. M. (2013). Neural  
1117 representations of events arise from temporal community structure. *Nature Neuroscience*, 16(4),  
1118 486–492. <https://doi.org/10.1038/nn.3331>
- 1119 Schuck, N. W., Cai, M. B., Wilson, R. C., & Niv, Y. (2016). Human Orbitofrontal Cortex Represents a  
1120 Cognitive Map of State Space. *Neuron*, 91(6), 1402–1412.  
1121 <https://doi.org/10.1016/j.neuron.2016.08.019>
- 1122 Schuck, N. W., & Niv, Y. (2019). Sequential replay of nonspatial task states in the human hippocampus.  
1123 *Science*, 364(6447), eaaw5181. <https://doi.org/10.1126/science.aaw5181>
- 1124 Soltani, A., & Izquierdo, A. (2019). Adaptive learning under expected and unexpected uncertainty.  
1125 *Nature Reviews Neuroscience*, 20(10), 635–644. <https://doi.org/10.1038/s41583-019-0180-y>
- 1126 Vazey, E. M., & Aston-Jones, G. (2014). Designer receptor manipulations reveal a role of the locus  
1127 coeruleus noradrenergic system in isoflurane general anesthesia. *Proceedings of the National  
1128 Academy of Sciences of the United States of America*, 111(10), 3859–3864.  
1129 <https://doi.org/10.1073/pnas.1310025111>
- 1130 Verbeke, P., & Verguts, T. (2019). Learning to synchronize: How biological agents can couple neural  
1131 task modules for dealing with the stability-plasticity dilemma. *PLOS Computational Biology*, 15(8),  
1132 e1006604. Retrieved from <https://doi.org/10.1371/journal.pcbi.1006604>
- 1133 Vikbladh, O. M., Meager, M. R., King, J., Blackmon, K., Devinsky, O., Shohamy, D., ... Daw, N. D.  
1134 (2019). Hippocampal Contributions to Model-Based Planning and Spatial Memory. *Neuron*, 102(3),  
1135 683-693.e4. <https://doi.org/10.1016/j.neuron.2019.02.014>
- 1136 Whittington, J. C. R., Muller, T. H., Mark, S., Chen, G., Barry, C., Burgess, N., & Behrens, T. E. J.  
1137 (2019). The Tolman-Eichenbaum Machine: Unifying space and relational memory through  
1138 generalisation in the hippocampal formation. *BioRxiv*, 770495. <https://doi.org/10.1101/770495>
- 1139 Wikenheiser, A., & Schoenbaum, G. (2016). Over the river, through the woods: cognitive maps in the  
1140 hippocampus and orbitofrontal cortex. *Nature Reviews Neuroscience*, 17.  
1141 <https://doi.org/10.1038/nrn.2016.56>
- 1142 Wilson, R. C., Nassar, M. R., & Gold, J. I. (2010). Bayesian online learning of the hazard rate in change-  
1143 point problems. *Neural Computation*, 22(9), 2452–2476. [https://doi.org/10.1162/NECO\\_a\\_00007](https://doi.org/10.1162/NECO_a_00007)
- 1144 Wilson, R. C., Nassar, M. R., & Gold, J. I. (2013). A mixture of delta-rules approximation to bayesian  
1145 inference in change-point problems. *PLoS Computational Biology*, 9(7), e1003150–e1003150.  
1146 <https://doi.org/10.1371/journal.pcbi.1003150>
- 1147 Wilson, R. C., Takahashi, Y. K., Schoenbaum, G., & Niv, Y. (2014). Orbitofrontal cortex as a cognitive  
1148 map of task space. *Neuron*, 81(2), 267–279. <https://doi.org/10.1016/j.neuron.2013.11.005>
- 1149 Yu, A. J., & Dayan, P. (2005). Uncertainty, neuromodulation, and attention. *Neuron*, 46(4), 681–692.  
1150 <https://doi.org/10.1016/j.neuron.2005.04.026>
- 1151 Yu, L. Q., Wilson, R. C., & Nassar, M. R. (2021). Adaptive learning is structure learning in time.  
1152 *Neuroscience & Biobehavioral Reviews*, 128, 270–281.  
1153 <https://doi.org/https://doi.org/10.1016/j.neubiorev.2021.06.024>

- 1104 Yu, L., Wilson, R., & Nassar, M. (2020). *Adaptive learning is structure learning in time*.  
1105 <https://doi.org/10.31234/osf.io/r637c>
- 1106 Zacks, J. M., Speer, N. K., Swallow, K. M., Braver, T. S., & Reynolds, J. R. (2007). Event perception: A  
1107 mind-brain perspective. *Psychological Bulletin*, Vol. 133, pp. 273–293.  
1108 <https://doi.org/10.1037/0033-2909.133.2.273>
- 1109
